# Supplementary material for: Platinum trimethyl bipyridyl thiolates – new, tunable, red- to near IR emitting luminophores for bioimaging applications
Source: Royal Society of Chemistry journal article supplement (doi:10.1039/c5cc04003e), 2015-01-01
Supplement: c5cc04003e1.pdf [file c5cc04003e1.pdf]

## Electronic Supporting Information

### Platinum Trimethyl Bipyridyl Thiolates – A New Class of Tunable, Red- to Near IR Emitting Lumophores for Bioimaging Applications

Harriet L. Steel,<sup>a</sup> Sarah L. Allinson,<sup>a</sup> Jane Andre,<sup>a</sup> Michael P. Coogan,<sup>b\*</sup> and James A. Platts<sup>c</sup>

<sup>a</sup> Lancaster Biomedical Sciences, Furness Building, Lancaster University, Bailrigg, Lancaster LA1 4YG.

<sup>b</sup> Chemistry Department, Faraday Building, Lancaster University, Bailrigg, Lancaster, LA1 4YB.

<sup>c</sup> Cardiff School of Chemistry, Cardiff University, Park Place, Cardiff CF10 3AT.

#### Contents

#### S1. Experimental procedures for synthetic work.

#### S2. Crystallographic data

#### S3. Flow cytometry

#### S4. Confocal microscopy

#### S5. DFT calculations

#### S1. Experimental.

##### General experimental.

All starting materials, reagents and solvents were purchased from commercial suppliers and used as supplied unless otherwise stated. Toluene was dried over sodium and purified by distillation. <sup>1</sup>H-NMR and <sup>13</sup>C-NMR spectra were recorded at 400 and 100 MHz respectively on a Bruker Avance III 400 and referenced to residual solvent peaks unless otherwise reported. Chemical shifts are reported in ppm, and coupling constants in Hz. IR spectra were recorded on an Agilent Technologies Cary 630 FTIR Spectrometer as thin films or solids and are reported in wavenumbers (cm<sup>-1</sup>). UV vis spectra were recorded on an Agilent Technologies Cary 60. Steady state emission and excitation spectra were recorded on an Agilent Technologies Cary Eclipse. Time-resolved spectra were recorded on a PicoQuant FluoTime 300 exciting with an LDH-P-C-375 and decays analysed with the program FluoFit. Melting points are uncorrected. Mass spectra were recorded at the EPSRC National Mass Spectrometry Service Centre in Swansea on a Thermo Scientific LTQ Orbitrap XL. PtMe<sub>3</sub>I was obtained from Strem.

##### [PtMe<sub>3</sub>(bpy)] **1**.

To a flask containing PtMe<sub>3</sub> (500 mg, 1.36 mmol) and 2,2'-bipyridine (212 mg, 1.36 mmol) was added toluene (5 ml) and the mixture heated at 100° C. for 15 minute then cooled to RT. Pale yellow crystals formed and the solution was filtered to obtain **1** (592 mg, 83%) as previously reported.

##### [PtMe<sub>3</sub>(4,4'-dimethoxybipyridyl)] **2**.

To a flask containing PtMe<sub>3</sub> (50 mg, 0.14 mmol) and 4,4'-dimethoxybipyridine (30 mg, 0.14 mmol) was added chloroform (1 ml) and heated to reflux, at which point all the reactants passed into solution. The solution was heated at reflux for a further 10 minutes then left to cool to room temperature overnight while pale yellow crystals grew. The product was collected by filtration to give **2** (68 mg, 83%) as colourless crystals. <sup>1</sup>H (DMSO, evidence of displacement of iodide by DMSO was observed upon standing or heating, but **2** is insufficiently soluble in less coordinating solvents) δ 8.68 (2h, d, J= 6.2 Hz, satellites J<sub>Pt-H</sub> = 20.0 Hz, bpyH6,6') 8.31 (2H, d, J = 2.5 Hz, bpyH3,3') 7.38 (2H, dd, J =6.2, 2.5 Hz, bpy H5,5') 4.06 (6H, s, 2 x OMe) 1.32 (6H, s, satellites J<sub>Pt-H</sub>= 69.7 Hz, 2 x PtMe eq) 0.56 (3H, s, , satellites J<sub>Pt-H</sub>= 73.9 Hz, PtMe ax); <sup>13</sup>C δ 166.3, 154.9, 146.8, 111.6, 109.9, 55.6, 6.0,

-8.8;  $^{195}\text{Pt}$   $\delta$  - 2762; IR  $\nu_{\text{max}}$  2972, 2892, 2810, 1607, 1562, 1257, 1255, 1029, 897  $\text{cm}^{-1}$ ; uv  $\lambda_{\text{max}}$  ( $\epsilon$ ) 316 (41470) 325 (39117) 383 (7823) nm; m/z isotope match on  $\text{C}_{15}\text{H}_{21}\text{IN}_2\text{O}_2\text{PtNa}$   $[\text{M}+\text{Na}]^+$  (see ESI); HRMS  $\text{C}_{15}\text{H}_{21}\text{IN}_2\text{O}_2\text{PtNa}$  calculated, 606.0189 observed 606.0191. **Crystal Data** for  $\text{C}_{12}\text{H}_{9.6}\text{I}_{0.8}\text{N}_{1.6}\text{O}_{1.6}\text{Pt}_{0.8}$  ( $M=466.66$  g/mol): monoclinic, space group  $\text{P2}_1/\text{n}$  (no. 14),  $a = 11.1595(10)$  Å,  $b = 11.6084(10)$  Å,  $c = 13.5382(14)$  Å,  $\beta = 103.102(10)^\circ$ ,  $V = 1708.2(3)$  Å<sup>3</sup>,  $Z = 5$ ,  $T = 100$  K,  $\mu(\text{Mo K}\alpha) = 10.025$   $\text{mm}^{-1}$ ,  $D_{\text{calc}} = 2.2681$   $\text{g}/\text{cm}^3$ , 8596 reflections measured ( $7.02^\circ \leq 2\theta \leq 58.82^\circ$ ), 4058 unique ( $R_{\text{int}} = 0.0403$ ,  $R_{\text{sigma}} = 0.0568$ ) which were used in all calculations. The final  $R_1$  was 0.0367 ( $I \geq 2u(I)$ ) and  $wR_2$  was 0.1120 (all data).

[PtMe<sub>3</sub>(4,4'-dimethoxycarbonylbipyridyl)] **3**.

To a flask containing PtMe<sub>3</sub> (50 mg, 0.14 mmol) and 4,4'-dimethoxycarbonylbipyridine (40 mg, 0.15 mmol) was added chloroform (1 ml) and heated to reflux, at which point all the reactants passed into solution. The solution was heated at reflux for a further 10 minutes then left to cool to room temperature overnight. To the resulting clear red solution was then added methanol (5 ml) which induced crystallisation of the product which was collected by filtration to give **3** (76 mg, 85%) as iridescent red plates.  $^1\text{H}$  ( $\text{CDCl}_3$ )  $\delta$  9.12 (2H, d,  $J = 5.8$  Hz, satellites  $J_{\text{H-Pt}} = 9.8$  Hz, bpy H6,6') 8.82 (2H, d,  $J = 1.5$  Hz, bpy H3,3') 8.12 (2H, dd,  $J = 5.8, 1.5$  Hz, bpy H5,5') 4.03 (6H, s, 2 x  $\text{CO}_2\text{CH}_3$ ) 1.55 (6H, s, satellites  $J_{\text{H-Pt}} = 70.6$  Hz, 2 x Pt- $\text{CH}_3$  eq) 0.54 (3H, s, satellites  $J_{\text{H-Pt}} = 72.2$  Hz, Pt- $\text{CH}_3$  ax.);  $^{13}\text{C}$   $\delta$  163.7, 155.0, 148.5, 128.3, 123.5, 53.6, 8.3, -5.8;  $^{195}\text{Pt}$   $\delta$  -2867; IR  $\nu_{\text{max}}$  3445, 2901, 1732, 1562, 1264, 1240, 1227, 959, 910  $\text{cm}^{-1}$ ; uv  $\lambda_{\text{max}}$  ( $\epsilon$ ) 314 (10451) 323 (10161) 371 (5709) nm; m/z isotope match on  $\text{C}_{17}\text{H}_{21}\text{IN}_2\text{O}_4\text{PtNa}$   $[\text{M}+\text{Na}]^+$  (see ESI); HRMS  $^{17}\text{H}_{21}\text{IN}_2\text{O}_4\text{PtNa}$  calculated, 661.0065 observed 661.0063.

[PtMe<sub>3</sub>(bpy)(Py)] PF<sub>6</sub> **4**.

To a flask containing **1** (100 mg, 0.191 mmol), KPF<sub>6</sub> (100 mg, 0.543 mmol) and pyridine (100  $\mu\text{L}$ , 98.2 mg, 1.24 mmol) was added MeCN (5 ml) and the mixture heated until reflux was reached at which point all reactants dissolved and a clear solution was formed. The mixture was then cooled to 50 ° C. and stirred for 30 minutes at this temperature before the addition of water (5 ml) and cooling to room temperature for 16 hours upon which colourless crystals formed and were isolated by filtration to give **4** (86 mg, 73 %).  $^1\text{H}$   $\delta$  8.98 (2H, d, 8.0 Hz, +  $^{195}\text{Pt}$  satellites,  $J_{\text{H-Pt}} = 12.0$  Hz, bpy H6,6') 8.51 (2H, d, 8.0 Hz, +  $^{195}\text{Pt}$  satellites,  $J_{\text{H-Pt}} = 20.0$  Hz, Py H2,H6) 8.30 (2H, m, Py H3,H5) 8.19 (2H, m, bpy H4,4') 7.87 (3H, m, bpy H3,3' & Py H4) 7.35 (2H, m, bpy H5,5') 1.21 (6H, s, Pt satellites  $J_{\text{H-Pt}} = 67.0$  Hz, 2 x Pt $\text{CH}_3$  eq.) 0.51 (3H, s, Pt satellites  $J_{\text{H-Pt}} = 70.2$  Hz, Pt $\text{CH}_3$  ax.);  $^{13}\text{C}$   $\delta$  155.2, 149.0, 147.5 (+ satellites  $J_{\text{C-Pt}} = 8$  Hz), 141.2 139.7, 128.8 (+ satellites  $J_{\text{C-Pt}} = 7$  Hz), 127.0 (+ satellites  $J_{\text{C-Pt}} = 6$  Hz), 125.6(+ satellites  $J_{\text{C-Pt}} = 4$  Hz), -2.9 (+ satellites  $J_{\text{C-Pt}} = 688$  Hz), -9.8 (+ satellites  $J_{\text{Pt-C}} = 662$  Hz);  $^{195}\text{Pt}$   $\delta$  -2473; IR  $\nu_{\text{max}}$  2959, 2903, 2821, 1605, 558  $\text{cm}^{-1}$ ; uv  $\lambda_{\text{max}}$  ( $\epsilon$ ) 297 (21781), 309 (21906) nm; m/z 474-478 isotope match on  $\text{C}_{18}\text{H}_{22}\text{N}_3\text{Pt}$   $[\text{M}-\text{PF}_6]^+$  (see ESI); HRMS,  $\text{C}_{18}\text{H}_{22}\text{N}_3\text{Pt}$  calculated 472.1419, observed 472.1418. **Crystal Data** for  $\text{C}_{20}\text{H}_{20}\text{N}_3\text{F}_6\text{PPt}$  ( $M=620.44$  g/mol): monoclinic, space group  $\text{P2}_1/\text{c}$  (no. 14),  $a = 10.9042(2)$  Å,  $b = 12.0936(3)$  Å,  $c = 15.9712(3)$  Å,  $\beta = 93.7300(16)^\circ$ ,  $V = 2101.68(7)$  Å<sup>3</sup>,  $Z = 4$ ,  $T = 100.00(10)$  K,  $\mu(\text{Cu K}\alpha) = 13.782$   $\text{mm}^{-1}$ ,  $D_{\text{calc}} = 1.9607$   $\text{g}/\text{cm}^3$ , 6810 reflections measured ( $8.12^\circ \leq 2\theta \leq 145.98^\circ$ ), 3990 unique ( $R_{\text{int}} = 0.0315$ ,  $R_{\text{sigma}} = 0.0354$ ) which were used in all calculations. The final  $R_1$  was 0.0394 ( $I \geq 2u(I)$ ) and  $wR_2$  was 0.1252 (all data).

[PtMe<sub>3</sub>(bpy)(Py-3- $\text{CH}_2\text{OH}$ )] PF<sub>6</sub> **5**.

To a flask containing **1** (100 mg, 0.191 mmol), KPF<sub>6</sub> (100 mg, 0.543 mmol) and 3-hydroxymethylpyridine (100  $\mu\text{L}$ , 113 mg, 1 mmol) was added MeCN (5 ml) and the mixture heated until reflux was reached at which point all reactants dissolved and a clear solution was formed. The mixture was then cooled to 50 ° C. and stirred for 30 minutes at this temperature before the addition of water (5 ml) and cooling to room temperature for 16 hours. After this time all the volatiles were removed on a rotary evaporator and the residues recrystallised from acetone/water to give colourless crystals which were isolated by filtration to give **5** (84 mg, 68 %).  $^1\text{H}$   $\delta$  8.97 (2H, d, 5.0 Hz, satellites  $J_{\text{H-Pt}}=13.3$  Hz, bpy-H6,6') 8.49 (2H, d, 6.3 Hz, bpy H3,3') 8.29 (2H, m, bpy-H4,4') 8.14 (1H, s, satellites  $J_{\text{H-Pt}}= 11.5$  Hz, Py H2) 8.03 (1H, d,  $J = 5.6$  Hz, satellites  $J_{\text{H-Pt}}=11.0$  Hz, Py-H6) 7.78 (1H, d,  $J = 8.5$  Hz, Py-H4) 7.28 (1H, dd,  $J = 7.8, 5.6$  Hz, Py-H5) 4.48 (2H, d,  $J = 5.9$  Hz, Py $\text{CH}_2\text{OH}$ ) 3.56 (1H, t,  $J=5.9$  Hz, Py $\text{CH}_2\text{OH}$ ) 1.22 (6H, s, satellites  $J_{\text{Pt-H}} = 67.7$  Hz, PtMe<sub>eqx2</sub>) 0.52 (3H, s, satellites  $J_{\text{Pt-H}} = 70.8$  Hz, PtMe<sub>ax</sub>);  $^{13}\text{C}$   $\delta$  155.1, 147.44, 147.41 (+ satellites  $J_{\text{Pt-C}} = 15.4$  Hz) 146.8, 141.2, 140.9, 137.6, 128.7 (+ satellites  $J_{\text{Pt-C}} = 13.8$  Hz), 126.4, 125.4 (+satellites,  $J_{\text{Pt-C}}=8.5$  Hz) 60.8, -2.9 (+satellites,  $J_{\text{Pt-C}} =$

688 Hz), -9.7 (+satellites,  $J_{\text{Pt-C}} = 656$  Hz);  $^{195}\text{Pt}$   $\delta$  -2474; IR  $\nu_{\text{max}}$  2955, 2894, 1603, 555  $\text{cm}^{-1}$ ; uv  $\lambda_{\text{max}}$  ( $\epsilon$ ) 300 (30516), 310 (32258) nm; m/z isotope match on  $\text{C}_{19}\text{H}_{24}\text{N}_3\text{OPt} [\text{M-PF}_6]^+$  (see ESI); HRMS  $\text{C}_{19}\text{H}_{24}\text{N}_3\text{OPt}$  calculated 502.1524, observed 502.1524. **Crystal Data** for  $\text{C}_{18}\text{H}_{23}\text{N}_3\text{OF}_6\text{PPt}$  ( $M = 648.45$  g/mol): triclinic, space group P-1 (no. 2),  $a = 9.1410(4)$  Å,  $b = 9.5731(4)$  Å,  $c = 13.2139(6)$  Å,  $\alpha = 108.296(4)^\circ$ ,  $\beta = 97.486(4)^\circ$ ,  $\gamma = 95.712(3)^\circ$ ,  $V = 1076.32(9)$  Å<sup>3</sup>,  $Z = 2$ ,  $T = 99.98(13)$  K,  $\mu(\text{Cu K}\alpha) = 13.529$   $\text{mm}^{-1}$ ,  $D_{\text{calc}} = 2.0007$   $\text{g/cm}^3$ , 6376 reflections measured ( $7.16^\circ \leq 2\theta \leq 146.02^\circ$ ), 4066 unique ( $R_{\text{int}} = 0.0205$ ,  $R_{\text{sigma}} = 0.0304$ ) which were used in all calculations. The final  $R_1$  was 0.0211 ( $I \geq 2u(I)$ ) and  $wR_2$  was 0.0755 (all data).

[PtMe<sub>3</sub>(bpy)(Py-4-CO<sub>2</sub>Et)] PF<sub>6</sub> **6**.

To a flask containing **1** (100 mg, 0.191 mmol), KPF<sub>6</sub> (100 mg, 0.543 mmol) and ethylisonicotinate (100  $\mu\text{L}$ , 111 mg, 0.733 mmol) was added MeCN (5 ml) and heated to 50 ° C. The mixture which contained solid material throughout the procedure was stirred for 30 minutes at this temperature before the addition of water (5 ml) and cooling to room temperature for 16 hours. The resultant large colourless blocks were isolated by filtration to give **6** (98 mg, 74 %).  $^1\text{H}$   $\delta$  8.83 (2H, d, 5.8 Hz, satellites  $J_{\text{H-Pt}} = 12.2$ , Hz bpy-H6,6') 8.38 (2H, d, 8.0 Hz, bpy H3,3') 8.22 (2H, m, PyH 2,6) 8.17 (2H, m, bpy H4,4') 7.75 (2H, m, bpy H5,5') 7.64 (2H, m, PyH3,5) 4.18 (2H, q, 7.3 Hz, CO<sub>2</sub>CH<sub>2</sub>CH<sub>3</sub>) 1.16 (3H, t, 7.3 Hz, CO<sub>2</sub>CH<sub>2</sub>CH<sub>3</sub>) 1.08 (6H, s, Pt satellites  $J_{\text{H-Pt}} = 66.4$  Hz, 2 x PtCH<sub>3</sub> eq.) 0.41 (3H, s, Pt satellites  $J_{\text{H-Pt}} = 71.2$  Hz, PtCH<sub>3</sub> ax.);  $^{13}\text{C}$   $\delta$  164.1, 155.3, 151.2, 150.2, 147.3 (Pt satellites  $J_{\text{Pt-H}} = 14.6$  Hz) 141.3, 128.8 (Pt satellites  $J_{\text{Pt-H}} = 12.2$  Hz) 125.9 (Pt satellites  $J_{\text{Pt-H}} = 10.2$  Hz) 125.6 (Pt satellites  $J_{\text{Pt-H}} = 8.4$  Hz) 63.0, 13.8, -2.8 (Pt satellites  $J_{\text{Pt-H}} = 687.0$  Hz) -9.4 (Pt satellites  $J_{\text{Pt-H}} = 662.2$  Hz);  $^{195}\text{Pt}$   $\delta$  -2473; IR  $\nu_{\text{max}}$  2978, 2905, 1730, 1603, 558  $\text{cm}^{-1}$ ; uv  $\lambda_{\text{max}}$  ( $\epsilon$ ) 278 (26666) 290 (27750) 298 (29083) 309 (24666) nm; m/z isotope match on  $\text{C}_{21}\text{H}_{26}\text{N}_3\text{O}_2\text{Pt} [\text{M-PF}_6]^+$  (see ESI); HRMS  $\text{C}_{21}\text{H}_{26}\text{N}_3\text{O}_2\text{Pt}$  calculated 544.1630, observed 544.1626. **Crystal Data** for  $\text{C}_{21}\text{H}_{26}\text{N}_3\text{O}_2\text{F}_6\text{PPt}$  ( $M = 677.47$  g/mol): monoclinic, space group P2<sub>1</sub>/n (no. 14),  $a = 10.94969(19)$  Å,  $b = 14.3600(2)$  Å,  $c = 15.7460(3)$  Å,  $\beta = 96.7748(17)^\circ$ ,  $V = 2458.57(8)$  Å<sup>3</sup>,  $Z = 4$ ,  $T = 289.33(10)$  K,  $\mu(\text{Cu K}\alpha) = 11.910$   $\text{mm}^{-1}$ ,  $D_{\text{calc}} = 1.8301$   $\text{g/cm}^3$ , 8172 reflections measured ( $8.36^\circ \leq 2\theta \leq 148.4^\circ$ ), 4766 unique ( $R_{\text{int}} = 0.0252$ ,  $R_{\text{sigma}} = 0.0371$ ) which were used in all calculations. The final  $R_1$  was 0.0366 ( $I \geq 2u(I)$ ) and  $wR_2$  was 0.1323 (all data).

[PtMe<sub>3</sub>(bpy)(PPh<sub>3</sub>)] PF<sub>6</sub> **7**.

To a flask containing **1** (100 mg, 0.191 mmol), KPF<sub>6</sub> (100 mg, 0.543 mmol) and triphenylphosphine (50 mg, 0.191 mmol) was added MeCN (3 ml) and heated to reflux, at which point all the reactants passed into solution. The pale yellow solution was stirred as it cooled to room temperature over 30 minutes, then treated with 5 ml of water. A flocculent white solid immediately precipitated from solution which was collected by filtration then recrystallised from acetone to give **7** as colourless blocks (89 mg, 58 %).  $^1\text{H}$   $\delta$  8.42 (2H, d,  $J = 6.2$  Hz, satellites  $J_{\text{Pt-H}} = 19.7$  Hz, bpyH6,6') 8.32 (2H, d,  $J = 8.1$  Hz, bpy H3,3') 8.14 (2H, m, bpyH4,4') 7.57 (2H, m, bpy H5,5') 7.42 (3H, m, 3 x H-Ar) 7.29 (6H, m, 6 x H-Ar) 7.05, (6H, m, 6 x H-Ar) 1.36 (6H, d,  $J_{\text{H-P}} = 7.5$  Hz, satellites,  $J_{\text{Pt-H}} = 67.6$  Hz, 2 x Pt-Me ax) 0.51 (3H, d,  $J_{\text{P-H}} = 7.9$  Hz, satellites  $J_{\text{Pt-H}} = 59.0$  Hz, Pt-Me ax);  $^{13}\text{C}$   $\delta$  154.6, 147.9 (satellites,  $J_{\text{Pt-C}} = 12.5$  Hz), 140.7, 133.5, 133.4, 131.3, 131.3, 129.4, 129.3, 128.5 (satellites,  $J_{\text{Pt-C}} = 12.4$  Hz), 128.1 (satellites,  $J_{\text{Pt-C}} = 11.7$  Hz), 125.3 (satellites,  $J_{\text{Pt-C}} = 8.4$  Hz) 11.5 (d,  $J_{\text{P-C}} = 112$  Hz, satellites,  $J_{\text{Pt-C}} = 429$  Hz) -5.5 (d,  $J_{\text{P-C}} = 3.9$  Hz, satellites  $J_{\text{Pt-C}} = 641$  Hz);  $^{195}\text{Pt}$   $\delta$  -3062 (d,  $J_{\text{Pt-P}} = 993$  Hz);  $^{31}\text{P}$   $\delta$  -3.77 (s, satellites,  $J_{\text{Pt-P}} = 993$  Hz, Pt-PPh<sub>3</sub>) -146.87, (sept,  $J_{\text{P-F}} = 707$  Hz); IR  $\nu_{\text{max}}$  2963, 2913, 2825, 1478, 558  $\text{cm}^{-1}$ ; uv  $\lambda_{\text{max}}$  ( $\epsilon$ ) nm 302 (18112) 313 (19644); m/z isotope match on [M-PF<sub>6</sub>] (see ESI); HRMS  $\text{C}_{31}\text{H}_{32}\text{N}_2\text{P}_2\text{Pt}$  calculated, 658.1948 observed 658.1948.

[PtMe<sub>3</sub>(bpy)(PhNH<sub>2</sub>)] PF<sub>6</sub> **8**.

To a flask containing **1** (50 mg, 0.0955 mmol), KPF<sub>6</sub> (100 mg, 0.543 mmol) and aniline (0.1 ml, 102 mg, 1.09 mmol) was added MeCN (2.5 ml) and heated to reflux, at which point all the reactants passed into solution. The colourless solution was set aside overnight as it cooled to room temperature, during which time crystallisation occurred spontaneously, and the product was collected by filtration to give **8** (451 mg, 68 %) as pale yellow crystals. NMR showed the presence of 2 rotamers:  $^1\text{H}$  8.90 (2H (minor rotamer) d,  $J = 6.1$  Hz, satellites  $J_{\text{Pt-H}} = 19.1$  Hz) bpyH6,6') 8.71 (2H (major rotamer) d,  $J = 6.1$  Hz, satellites  $J_{\text{Pt-H}} = 18.2$  Hz) 8.56 (2H (minor rotamer) d,  $J = 8.0$  Hz, bpyH3,3') 8.30 (2H (minor rotamer) + 2H (major rotamer), m, bpyH3,3' (major rotamer) + bpyH4,4' minor rotamer) 8.18 (2H major rotamer, m, bpyH4,4') 7.86 (2H minor rotamer, m, bpyH5,5') 7.71 (2H major rotamer, m,

bpyH5,5') 7.10 (2H minor rotamer, m, N-ArH3,5) 6.83 (2H major rotamer, m, NArH3,5) 6.77 (1H major rotamer, m, NArH4) 6.64 (3H minor rotamer, m, NArH4 + NArH2,6) 6.16 (2H major rotamer, d,  $J = 7.0$  Hz, NArH2,6) 5.17 (s, broad, NH2, major rotamer, under integrates) 4.13 (s, broad, NH2 minor rotamer, under integrates) 1.20 (6H, minor rotamer, s, satellites  $J_{\text{Pt-H}} = 68.1$  Hz, 2 x PtMe eq) 1.15 (6H, major rotamer, s, satellites  $J_{\text{Pt-H}} = 67.5$  Hz, 2 x PtMe eq) 0.55 (3H, minor rotamer, s, satellites  $J_{\text{Pt-H}} = 76.9$  Hz, PtMe ax) 0.46 (3H, major rotamer, s, satellites  $J_{\text{Pt-H}} = 73.0$  Hz, PtMe ax);  $^{13}\text{C}$   $\delta$  155.5, 155.2, 147.8 147.7, 147.6, 147.5, 141.2, 140.8, 129.6, 129.2, 128.4 (satellites  $J_{\text{Pt-C}} = 13.1$  Hz), 128.1 (satellites  $J_{\text{Pt-C}} = 14.2$  Hz), 125.2 (satellites  $J_{\text{Pt-C}} = 8.2$  Hz), 125.0 (satellites  $J_{\text{Pt-C}} = 8.6$  Hz), 124.9, 124.3, 119.5, 115.0, -5.5 (satellites  $J_{\text{Pt-C}} = 686.5$  Hz) -6.1, -8.7 (satellites  $J_{\text{Pt-C}} = 679.7$  Hz) -8.9;  $^{195}\text{Pt}$   $\delta$  -2521; IR  $\nu_{\text{max}}$  3341, 3291, 2898, 2818, 1603, 1495, 828  $\text{cm}^{-1}$ ; uv  $\lambda_{\text{max}}$  ( $\epsilon$ ) 288 (25935) 296 (26032) 310 (20806) nm; m/z isotope match on  $\text{C}_{19}\text{H}_{24}\text{N}_3\text{Pt}$  [M-PF<sub>6</sub>] (see ESI); HRMS  $\text{C}_{19}\text{H}_{24}\text{N}_3\text{Pt}$  calculated, 489.1614 observed 489.1612.

[Pt(S-4-C<sub>6</sub>H<sub>4</sub>-CO<sub>2</sub>Me)Me<sub>3</sub>(bipyridyl)] **9**.

To a flask containing **1** (50 mg, 0.096 mmol), 4-mercaptomethylbenzoate (24 mg, 0.14 mmol) and sodium t-butoxide (10 mg, 0.10 mmol) was added acetonitrile (1 ml) and heated to 70 C with the immediate formation of a cloudy yellow solution. The mixture was maintained at 70 C for a further 35 minutes, and then cooled to ambient temperature before the addition of water (10 ml). After standing overnight the solid yellow product was collected by filtration then recrystallised from acetonitrile/water to give **9** (29 mg, 53 %) as yellow needles.  $^1\text{H}$   $\delta$  8.76 (2H, d,  $J = 5.5$  Hz, satellites  $J_{\text{Pt-H}} = 14.2$  Hz, bpy H6,6') 7.85-7.954H, m, bpyH3,3',4,4') 7.49-7.56 (1H, m, bpyH 5,5') 7.16 (2H, d,  $J = 8.5$  Hz, S-C<sub>6</sub>H<sub>4</sub>CO<sub>2</sub>Me, H3,5) 6.56 (2H, d,  $J = 8.5$  Hz, S-C<sub>6</sub>H<sub>4</sub>CO<sub>2</sub>Me, H2,6) 3.81 (3H, s, S-C<sub>6</sub>H<sub>4</sub>CO<sub>2</sub>Me) 1.24 (6H, s, satellites  $J_{\text{Pt-H}} = 70.5$  Hz, 2 x Pt-CH<sub>3</sub> eq) 0.28 (3H, s, satellites  $J_{\text{Pt-H}} = 65.5$  Hz, Pt-CH<sub>3</sub> ax);  $^{13}\text{C}$   $\delta$  153.9, 152.4, 148.8 (satellites  $J_{\text{Pt-C}} = 14.0$  Hz), 137.9, 134.5 (satellites  $J_{\text{Pt-C}} = 5.2$  Hz), 127.7 (satellites  $J_{\text{Pt-C}} = 8.0$  Hz), 126.4 (satellites  $J_{\text{Pt-C}} = 14.6$  Hz), 123.8, 122.8 (satellites  $J_{\text{Pt-C}} = 8.0$  Hz), 51.6, 0.0 (satellites  $J_{\text{Pt-C}} = 615.7$  Hz), -5.1 (satellites  $J_{\text{Pt-C}} = 681.5$  Hz);  $^{195}\text{Pt}$   $\delta$  2956; IR  $\nu_{\text{max}}$  2946, 2888, 2812, 1704, 1586, 1436, 1277, 1260, 1111, 1085, 763  $\text{cm}^{-1}$ ; uv  $\lambda_{\text{max}}$  ( $\epsilon$ ) 299 (41471) 308 (42944) 353 (12290) nm; m/z molecular ion not observed, m/z  $\text{C}_{13}\text{H}_{17}\text{N}_2\text{Pt}$  [M-S-C<sub>6</sub>H<sub>4</sub>CO<sub>2</sub>Me], HRMS  $\text{C}_{13}\text{H}_{17}\text{N}_2\text{Pt}$  calculated, 396.1039 observed 396.1034. **Crystal Data** for  $\text{C}_{20}\text{H}_{27}\text{N}_2\text{O}_2\text{PtS}$  ( $M = 563.58$  g/mol): monoclinic, space group P2<sub>1</sub>/c (no. 14),  $a = 14.3479(5)$  Å,  $b = 9.0481(3)$  Å,  $c = 16.1964(11)$  Å,  $\beta = 109.574(8)^\circ$ ,  $V = 1981.12(19)$  Å<sup>3</sup>,  $Z = 4$ ,  $T = 100$  K,  $\mu(\text{Mo K}\alpha) = 7.205$  mm<sup>-1</sup>,  $D_{\text{calc}} = 1.8894$  g/cm<sup>3</sup>, 15341 reflections measured ( $6.02^\circ \leq 2\theta \leq 54.98^\circ$ ), 4503 unique ( $R_{\text{int}} = 0.0245$ ,  $R_{\text{sigma}} = 0.0243$ ) which were used in all calculations. The final  $R_1$  was 0.0184 ( $I \geq 2u(I)$ ) and  $wR_2$  was 0.0736 (all data).

[Pt(S-4-C<sub>6</sub>H<sub>4</sub>-CO<sub>2</sub>Me)Me<sub>3</sub>(4,4'-dimethoxycarbonylbipyridyl)] **10**.

To a flask containing **8** (33 mg, 0.052 mmol), 4-mercaptomethylbenzoate (10 mg, 0.059 mmol) and sodium t-butoxide (5 mg, 0.052 mmol) was added acetonitrile (5 ml) and heated to 65 C with the immediate formation of a pale yellow-orange solution. The mixture was maintained at 65 C for a further 40 minutes, during which the solution turned red-orange. The solution was then concentrated to 1 ml, re-heated to 65 C and the clear solution was treated dropwise with water until it remained cloudy at this temperature. After the addition of 1 drop of acetonitrile returned a clear solution the mixture was allowed to cool to room temperature overnight before the solid product was collected by filtration to give **10** (22 mg, 62 %) as blood-red blocks.  $^1\text{H}$   $\delta$  8.90 (2H, d,  $J = 5.5$  Hz, satellites  $J_{\text{Pt-H}} = 13.5$  Hz, bpy-H 6,6') 8.52 (2H, s, bpy-H3,3') 8.06 (2H, d,  $J = 5.5$  Hz, bpy5,5') 7.16 (2H, d,  $J = 8.2$  Hz, S-C<sub>6</sub>H<sub>4</sub>-CO<sub>2</sub>CH<sub>3</sub> H2,6) 6.52 (2H, d,  $J = 8.2$  Hz, S-C<sub>6</sub>H<sub>4</sub>-CO<sub>2</sub>CH<sub>3</sub> H3,5) 4.10 (6H, s, 2 x bpy-CO<sub>2</sub>CH<sub>3</sub>) 3.82 (3H, s, S-C<sub>6</sub>H<sub>4</sub>-CO<sub>2</sub>CH<sub>3</sub>) 1.29 (6H, s, satellites  $J_{\text{Pt-H}} = 70.5$  Hz, 2 x Pt-CH<sub>3</sub> eq) 0.28 (3H, s, satellites  $J_{\text{Pt-H}} = 65.0$  Hz, Pt-CH<sub>3</sub> ax);  $^{13}\text{C}$   $\delta$  166.9, 163.4, 154.0, 151.6, 147.4 (satellites,  $J_{\text{Pt-C}} = 14.1$  Hz), 139.1, 134.3, 127.6, 125.8 (satellites,  $J_{\text{Pt-C}} = 14.6$  Hz), 124.1, 122.8 (satellites,  $J_{\text{Pt-H}} = 7.8$  Hz), 53.3, 51.4, 0.1 (satellites,  $J_{\text{Pt-C}} = 609.4$  Hz), -4.8 (satellites,  $J_{\text{Pt-H}} = 679.8$  Hz);  $^{195}\text{Pt}$   $\delta$ ; IR  $\nu_{\text{max}}$  2954, 2890, 2814, 1735, 1709, 1586, 1437, 1402, 1279, 1260, 1110, 1087, 1016, 763, 704  $\text{cm}^{-1}$ ; uv  $\lambda_{\text{max}}$  ( $\epsilon$ ) 309 (55862) 423 (5793) nm; m/z molecular ion not observed, m/z  $\text{C}_{17}\text{H}_{21}\text{N}_2\text{O}_4\text{Pt}$  [M-S-C<sub>6</sub>H<sub>4</sub>CO<sub>2</sub>Me], HRMS  $\text{C}_{17}\text{H}_{21}\text{N}_2\text{O}_4\text{Pt}$  calculated, 512.1149 observed 512.1142. **Crystal Data** for  $\text{C}_{25}\text{H}_{27}\text{N}_2\text{O}_6\text{PtS}$  ( $M = 678.65$  g/mol): triclinic, space group P-1 (no. 2),  $a = 7.2201(5)$  Å,  $b = 13.2276(9)$  Å,  $c = 14.0336(10)$  Å,  $\alpha = 70.675(5)^\circ$ ,  $\beta = 80.551(6)^\circ$ ,  $\gamma = 84.130(6)^\circ$ ,  $V = 1245.94(16)$  Å<sup>3</sup>,  $Z = 2$ ,  $T = 100$  K,  $\mu(\text{Mo K}\alpha) = 5.756$  mm<sup>-1</sup>,  $D_{\text{calc}} = 1.8088$  g/cm<sup>3</sup>, 21239 reflections measured ( $5.18^\circ \leq 2\theta \leq 55.02^\circ$ ), 5677 unique ( $R_{\text{int}} = 0.2641$ ,  $R_{\text{sigma}} = 0.1575$ ) which were used in all calculations. The final  $R_1$  was 0.0804 ( $I \geq 2u(I)$ ) and  $wR_2$  was 0.2041 (all data).

## S2. Crystallographic data.

Crystal data for **2**.

Table 1 Crystal data and structure refinement for **2**.

|                                                |                                                               |
|------------------------------------------------|---------------------------------------------------------------|
| Identification code                            | 2                                                             |
| Empirical formula                              | $C_{12}H_{9.6}I_{0.8}N_{1.6}O_{1.6}Pt_{0.8}$                  |
| Formula weight                                 | 466.66                                                        |
| Temperature/K                                  | 100 K                                                         |
| Crystal system                                 | monoclinic                                                    |
| Space group                                    | $P2_1/n$                                                      |
| $a/\text{\AA}$                                 | 11.1595(10)                                                   |
| $b/\text{\AA}$                                 | 11.6084(10)                                                   |
| $c/\text{\AA}$                                 | 13.5382(14)                                                   |
| $\alpha/^\circ$                                | 90                                                            |
| $\beta/^\circ$                                 | 103.102(10)                                                   |
| $\gamma/^\circ$                                | 90                                                            |
| Volume/ $\text{\AA}^3$                         | 1708.2(3)                                                     |
| Z                                              | 5                                                             |
| $\rho_{\text{calc}}/\text{g/cm}^3$             | 2.2681                                                        |
| $\mu/\text{mm}^{-1}$                           | 10.025                                                        |
| F(000)                                         | 1080.7                                                        |
| Crystal size/ $\text{mm}^3$                    | 0.15 x 0.15 x 0.15                                            |
| Radiation                                      | Mo K $\alpha$ ( $\lambda = 0.71073$ )                         |
| 2 $\Theta$ range for data collection/ $^\circ$ | 7.02 to 58.82                                                 |
| Index ranges                                   | $-13 \leq h \leq 14, -11 \leq k \leq 15, -18 \leq l \leq 13$  |
| Reflections collected                          | 8596                                                          |
| Independent reflections                        | 4058 [ $R_{\text{int}} = 0.0403, R_{\text{sigma}} = 0.0568$ ] |
| Data/restraints/parameters                     | 4058/0/194                                                    |
| Goodness-of-fit on $F^2$                       | 0.775                                                         |
| Final R indexes [ $I \geq 2\sigma(I)$ ]        | $R_1 = 0.0367, wR_2 = 0.1041$                                 |
| Final R indexes [all data]                     | $R_1 = 0.0426, wR_2 = 0.1120$                                 |
| Largest diff. peak/hole / $e \text{\AA}^{-3}$  | 2.12/-2.46                                                    |

Table 2 Fractional Atomic Coordinates ( $\times 10^4$ ) and Equivalent Isotropic Displacement Parameters ( $\text{\AA}^2 \times 10^3$ ) for **7**.  $U_{\text{eq}}$  is defined as 1/3 of of the trace of the orthogonalised  $U_{ij}$  tensor.

| Atom | x          | y           | z           | U(eq)     |
|------|------------|-------------|-------------|-----------|
| Pt1  | 466.60(19) | 3691.42(18) | 2865.26(17) | 14.91(10) |
| I1   | -1493.2(4) | 2542.5(3)   | 1614.6(3)   | 19.61(13) |
| N2   | 1485(5)    | 3678(4)     | 1691(4)     | 16.1(11)  |
| N4   | 39(4)      | 5338(4)     | 2120(4)     | 14(1)     |
| C0aa | 1453(5)    | 4647(5)     | 1157(4)     | 11.5(10)  |
| C9   | 654(5)     | 5581(5)     | 1395(4)     | 12.5(11)  |
| C10  | -517(8)    | 3839(6)     | 3975(6)     | 29.6(17)  |
| C13  | -681(6)    | 6165(5)     | 2377(5)     | 20.0(13)  |

|      |         |         |          |          |
|------|---------|---------|----------|----------|
| C14  | 1070(6) | 2150(5) | 3544(5)  | 22.5(13) |
| C17  | 2934(6) | 2867(6) | 830(5)   | 24.7(14) |
| C2aa | 2221(6) | 2813(5) | 1531(5)  | 21.7(13) |
| O3   | 3634(4) | 3904(4) | -396(4)  | 26.0(11) |
| C4   | 561(5)  | 6637(5) | 920(5)   | 17.8(12) |
| C1aa | 2152(5) | 4784(5) | 425(5)   | 15.2(11) |
| C6   | -166(6) | 7498(5) | 1203(5)  | 17.1(12) |
| C7   | -811(6) | 7244(6) | 1953(5)  | 21.0(13) |
| C8   | 2914(6) | 3888(5) | 276(5)   | 17.3(12) |
| O2   | -185(5) | 8507(4) | 729(4)   | 23.7(10) |
| C3   | 3621(6) | 4921(5) | -1003(5) | 24.7(14) |
| C5   | -806(7) | 9448(6) | 1083(6)  | 32.0(17) |
| C18  | 1930(6) | 4485(6) | 3835(5)  | 28.5(15) |

Table 3 Anisotropic Displacement Parameters ( $\text{\AA}^2 \times 10^3$ ) for 7. The Anisotropic displacement factor exponent takes the form:  $-2\pi^2[h^2a^{*2}U_{11}+2hka^*b^*U_{12}+\dots]$ .

| Atom | $U_{11}$  | $U_{22}$ | $U_{33}$  | $U_{12}$  | $U_{13}$ | $U_{23}$  |
|------|-----------|----------|-----------|-----------|----------|-----------|
| Pt1  | 20.46(15) | 9.02(15) | 17.42(16) | -0.79(7)  | 8.86(10) | 1.61(8)   |
| I1   | 25.0(2)   | 15.3(2)  | 20.7(2)   | -1.87(14) | 9.63(17) | -0.22(15) |
| N2   | 18(3)     | 11(3)    | 21(3)     | 1.6(17)   | 10(2)    | -1.2(19)  |
| N4   | 18(2)     | 8(2)     | 19(2)     | -1.1(18)  | 12.3(19) | 0(2)      |
| C0aa | 10(2)     | 6(2)     | 19(3)     | 6.1(19)   | 4(2)     | 3(2)      |
| C9   | 15(2)     | 8(3)     | 17(3)     | 2(2)      | 7(2)     | 3(2)      |
| C10  | 52(5)     | 20(3)    | 22(4)     | -2(3)     | 19(3)    | -6(3)     |
| C13  | 29(3)     | 14(3)    | 24(3)     | -1(2)     | 20(3)    | -1(2)     |
| C14  | 29(3)     | 18(3)    | 22(3)     | 6(3)      | 9(3)     | 14(3)     |
| C17  | 28(3)     | 14(3)    | 36(4)     | 13(3)     | 16(3)    | 2(3)      |
| C2aa | 32(3)     | 11(3)    | 27(3)     | 5(2)      | 16(3)    | 5(3)      |
| O3   | 34(3)     | 16(2)    | 37(3)     | 9.1(19)   | 27(2)    | 2(2)      |
| C4   | 17(3)     | 17(3)    | 23(3)     | -1(2)     | 11(2)    | 1(3)      |
| C1aa | 18(3)     | 8(3)     | 19(3)     | 0(2)      | 6(2)     | -4(2)     |
| C6   | 20(3)     | 11(3)    | 21(3)     | 2(2)      | 6(2)     | -2(2)     |
| C7   | 24(3)     | 16(3)    | 29(3)     | 4(3)      | 17(3)    | -3(3)     |
| C8   | 20(3)     | 16(3)    | 19(3)     | 1(2)      | 11(2)    | -5(2)     |
| O2   | 39(3)     | 11(2)    | 29(3)     | 8.6(18)   | 24(2)    | 7.5(19)   |
| C3   | 35(3)     | 21(3)    | 24(3)     | 5(3)      | 20(3)    | 0(3)      |
| C5   | 52(4)     | 13(3)    | 41(4)     | 12(3)     | 31(4)    | 2(3)      |
| C18  | 39(4)     | 24(4)    | 22(3)     | -8(3)     | 5(3)     | 1(3)      |

Table 4 Bond Lengths for 2.

| Atom | Atom | Length/Å  | Atom | Atom | Length/Å |
|------|------|-----------|------|------|----------|
| Pt1  | I1   | 2.7839(5) | C9   | C4   | 1.377(8) |
| Pt1  | N2   | 2.154(5)  | C13  | C7   | 1.371(9) |
| Pt1  | N4   | 2.164(5)  | C17  | C2aa | 1.372(8) |
| Pt1  | C10  | 2.059(7)  | C17  | C8   | 1.401(9) |
| Pt1  | C14  | 2.054(6)  | O3   | C8   | 1.343(7) |
| Pt1  | C18  | 2.066(7)  | O3   | C3   | 1.436(8) |
| N2   | C0aa | 1.333(7)  | C4   | C6   | 1.394(8) |
| N2   | C2aa | 1.346(7)  | C1aa | C8   | 1.387(8) |
| N4   | C9   | 1.349(6)  | C6   | C7   | 1.403(8) |
| N4   | C13  | 1.347(8)  | C6   | O2   | 1.333(7) |
| C0aa | C9   | 1.485(7)  | O2   | C5   | 1.433(7) |
| C0aa | C1aa | 1.402(7)  |      |      |          |

Table 5 Bond Angles for 2.

| Atom | Atom | Atom | Angle/°   | Atom | Atom | Atom | Angle/°  |
|------|------|------|-----------|------|------|------|----------|
| N2   | Pt1  | I1   | 91.19(14) | C9   | C0aa | N2   | 116.3(5) |
| N4   | Pt1  | I1   | 94.58(13) | C1aa | C0aa | N2   | 121.9(5) |
| N4   | Pt1  | N2   | 76.08(17) | C1aa | C0aa | C9   | 121.9(5) |
| C10  | Pt1  | I1   | 90.5(2)   | C0aa | C9   | N4   | 115.8(5) |
| C10  | Pt1  | N2   | 175.6(2)  | C4   | C9   | N4   | 121.9(5) |
| C10  | Pt1  | N4   | 99.7(2)   | C4   | C9   | C0aa | 122.3(5) |
| C14  | Pt1  | I1   | 89.29(19) | C7   | C13  | N4   | 123.7(6) |
| C14  | Pt1  | N2   | 98.6(2)   | C8   | C17  | C2aa | 117.9(5) |
| C14  | Pt1  | N4   | 173.5(2)  | C17  | C2aa | N2   | 123.2(6) |
| C14  | Pt1  | C10  | 85.5(3)   | C3   | O3   | C8   | 118.0(5) |
| C18  | Pt1  | I1   | 177.6(2)  | C6   | C4   | C9   | 119.8(5) |
| C18  | Pt1  | N2   | 89.9(2)   | C8   | C1aa | C0aa | 118.4(5) |
| C18  | Pt1  | N4   | 87.8(2)   | C7   | C6   | C4   | 118.3(5) |
| C18  | Pt1  | C10  | 88.6(3)   | O2   | C6   | C4   | 116.4(5) |
| C18  | Pt1  | C14  | 88.4(3)   | O2   | C6   | C7   | 125.3(5) |
| C0aa | N2   | Pt1  | 116.1(4)  | C6   | C7   | C13  | 118.2(6) |
| C2aa | N2   | Pt1  | 124.5(4)  | O3   | C8   | C17  | 115.8(5) |
| C2aa | N2   | C0aa | 119.1(5)  | C1aa | C8   | C17  | 119.5(6) |
| C9   | N4   | Pt1  | 115.4(4)  | C1aa | C8   | O3   | 124.7(6) |
| C13  | N4   | Pt1  | 126.2(4)  | C5   | O2   | C6   | 117.7(5) |
| C13  | N4   | C9   | 118.1(5)  |      |      |      |          |

Table 6 Hydrogen Atom Coordinates ( $\text{\AA} \times 10^4$ ) and Isotropic Displacement Parameters ( $\text{\AA}^2 \times 10^3$ ) for 2.

| Atom | x         | y         | z         | U(eq)    |
|------|-----------|-----------|-----------|----------|
| H2aa | 2247(6)   | 2145(5)   | 1915(5)   | 26.0(16) |
| H17  | 3416(6)   | 2245(6)   | 726(5)    | 29.6(17) |
| H1aa | 2106(5)   | 5460(5)   | 49(5)     | 18.2(14) |
| H13  | -1115(6)  | 5995(5)   | 2870(5)   | 24.0(16) |
| H7   | -1313(6)  | 7792(6)   | 2157(5)   | 25.3(16) |
| H4   | 982(5)    | 6776(5)   | 413(5)    | 21.4(14) |
| H5a  | -680(40)  | 10139(11) | 730(30)   | 48(3)    |
| H5b  | -1671(9)  | 9290(20)  | 960(40)   | 48(3)    |
| H5c  | -490(30)  | 9550(30)  | 1798(10)  | 48(3)    |
| H3a  | 2815(13)  | 5030(20)  | -1430(20) | 37(2)    |
| H3b  | 3830(40)  | 5579(8)   | -568(5)   | 37(2)    |
| H3c  | 4210(30)  | 4839(17)  | -1420(30) | 37(2)    |
| H10a | 33(10)    | 3780(40)  | 4630(6)   | 44(2)    |
| H10b | -930(40)  | 4571(18)  | 3910(20)  | 44(2)    |
| H10c | -1110(30) | 3230(30)  | 3900(20)  | 44(2)    |
| H14a | 1830(20)  | 1940(20)  | 3370(30)  | 34(2)    |
| H14b | 1200(40)  | 2227(12)  | 4267(5)   | 34(2)    |
| H14c | 460(20)   | 1566(10)  | 3310(30)  | 34(2)    |
| H18a | 2470(20)  | 3910(6)   | 4210(30)  | 43(2)    |
| H18b | 2380(30)  | 4940(30)  | 3448(6)   | 43(2)    |
| H18c | 1629(7)   | 4970(30)  | 4300(20)  | 43(2)    |

## Experimental

Single crystals of  $\text{C}_{12}\text{H}_{9.6}\text{I}_{0.8}\text{N}_{1.6}\text{O}_{1.6}\text{Pt}_{0.8}$  [2] were grown from MeCN. A suitable crystal was selected and mounted on a diffractometer. The crystal was kept at 100 K during data collection. Using Olex2 [1], the structure was solved with the olex2.solve [2] structure solution program using Charge Flipping and refined with the olex2.refine [3] refinement package using Gauss-Newton minimisation.

1. Dolomanov, O.V., Bourhis, L.J., Gildea, R.J., Howard, J.A.K. & Puschmann, H. (2009), *J. Appl. Cryst.* 42, 339-341.
2. Bourhis, L.J., Dolomanov, O.V., Gildea, R.J., Howard, J.A.K., Puschmann, H. (2015). *Acta Cryst.* A71, 59-75.
3. Bourhis, L.J., Dolomanov, O.V., Gildea, R.J., Howard, J.A.K., Puschmann, H. (2015). *Acta Cryst.* A71, 59-75.

## Crystal structure determination of [2]

**Crystal Data** for  $\text{C}_{12}\text{H}_{9.6}\text{I}_{0.8}\text{N}_{1.6}\text{O}_{1.6}\text{Pt}_{0.8}$  ( $M = 466.66$  g/mol): monoclinic, space group  $P2_1/n$  (no. 14),  $a = 11.1595(10)$   $\text{\AA}$ ,  $b = 11.6084(10)$   $\text{\AA}$ ,  $c = 13.5382(14)$   $\text{\AA}$ ,  $\beta = 103.102(10)^\circ$ ,  $V = 1708.2(3)$   $\text{\AA}^3$ ,  $Z = 5$ ,  $T = 100$  K,  $\mu(\text{Mo K}\alpha) = 10.025$   $\text{mm}^{-1}$ ,  $D_{\text{calc}} = 2.2681$   $\text{g/cm}^3$ , 8596 reflections measured ( $7.02^\circ \leq 2\theta \leq 58.82^\circ$ ), 4058 unique ( $R_{\text{int}} = 0.0403$ ,  $R_{\text{sigma}} = 0.0568$ ) which were used in all calculations. The final  $R_1$  was 0.0367 ( $I \geq 2\sigma(I)$ ) and  $wR_2$  was 0.1120 (all data).



## Refinement model description

Number of restraints - 0, number of constraints - 32.

### Details:

#### 1. Fixed Uiso

At 1.2 times of:

All C(H) groups

At 1.5 times of:

All C(H,H,H) groups

#### 2.a Aromatic/amide H refined with riding coordinates:

C2aa(H2aa), C17(H17), C1aa(H1aa), C13(H13), C7(H7), C4(H4)

#### 2.b Idealised Me refined as rotating group:

C5(H5a,H5b,H5c), C3(H3a,H3b,H3c), C10(H10a,H10b,H10c),

C14(H14a,H14b,H14c),

C18(H18a,H18b,H18c)

## Crystallographic data for **4**.

Table 1. Crystal data and structure refinement for **4**

|                                                |                                                               |
|------------------------------------------------|---------------------------------------------------------------|
| Identification code                            | <b>4</b>                                                      |
| Empirical formula                              | $C_{20}H_{20}N_3F_6PPt$                                       |
| Formula weight                                 | 620.44                                                        |
| Temperature/K                                  | 100.00(10)                                                    |
| Crystal system                                 | monoclinic                                                    |
| Space group                                    | $P2_1/c$                                                      |
| $a/\text{\AA}$                                 | 10.9042(2)                                                    |
| $b/\text{\AA}$                                 | 12.0936(3)                                                    |
| $c/\text{\AA}$                                 | 15.9712(3)                                                    |
| $\alpha/^\circ$                                | 90                                                            |
| $\beta/^\circ$                                 | 93.7300(16)                                                   |
| $\gamma/^\circ$                                | 90                                                            |
| Volume/ $\text{\AA}^3$                         | 2101.68(7)                                                    |
| Z                                              | 4                                                             |
| $\rho_{\text{calc}}/\text{g/cm}^3$             | 1.9607                                                        |
| $\mu/\text{mm}^{-1}$                           | 13.782                                                        |
| F(000)                                         | 1179.6                                                        |
| Crystal size/ $\text{mm}^3$                    | 0.15 x 0.15 x 0.2                                             |
| Radiation                                      | Cu $K\alpha$ ( $\lambda = 1.54184$ )                          |
| 2 $\Theta$ range for data collection/ $^\circ$ | 8.12 to 145.98                                                |
| Index ranges                                   | $-13 \leq h \leq 12, -14 \leq k \leq 12, -19 \leq l \leq 18$  |
| Reflections collected                          | 6810                                                          |
| Independent reflections                        | 3990 [ $R_{\text{int}} = 0.0315, R_{\text{sigma}} = 0.0354$ ] |
| Data/restraints/parameters                     | 3990/0/264                                                    |
| Goodness-of-fit on $F^2$                       | 1.034                                                         |
| Final R indexes [ $I \geq 2\sigma(I)$ ]        | $R_1 = 0.0394, wR_2 = 0.1235$                                 |
| Final R indexes [all data]                     | $R_1 = 0.0407, wR_2 = 0.1252$                                 |

Largest diff. peak/hole / e Å<sup>-3</sup> 2.14/-2.61

Table 2 Fractional Atomic Coordinates ( $\times 10^4$ ) and Equivalent Isotropic Displacement Parameters ( $\text{Å}^2 \times 10^3$ ) for 4.  $U_{\text{eq}}$  is defined as 1/3 of the trace of the orthogonalised  $U_{ij}$  tensor.

| Atom | x           | y           | z           | U(eq)    |
|------|-------------|-------------|-------------|----------|
| Pt1  | 7468.49(18) | 6364.07(16) | 5669.24(11) | 7.34(13) |
| N0aa | 7619(4)     | 7709(4)     | 6575(3)     | 11.3(9)  |
| C0aa | 8712(5)     | 8206(5)     | 6755(3)     | 11.9(10) |
| C1aa | 7826(5)     | 9482(5)     | 7686(3)     | 15.3(11) |
| C15  | 8835(6)     | 9101(5)     | 7303(4)     | 17.0(12) |
| C19  | 6692(6)     | 8973(5)     | 7498(3)     | 16.8(11) |
| C20  | 6628(5)     | 8082(5)     | 6949(3)     | 12.5(11) |
| P1   | 7373.4(12)  | 12853.5(11) | 8134.1(8)   | 10.6(3)  |
| F5   | 8541(3)     | 12035(3)    | 8176(2)     | 24.8(8)  |
| F6   | 6455(3)     | 11812(3)    | 8125(3)     | 26.7(8)  |
| F9   | 7341(3)     | 12829(4)    | 7138(2)     | 28.3(9)  |
| C2aa | 8763(5)     | 5452(5)     | 6347(3)     | 14.0(11) |
| C8   | 6204(5)     | 5547(5)     | 6335(3)     | 14.6(11) |
| C3aa | 7332(5)     | 5088(5)     | 4834(3)     | 16.4(11) |
| N4   | 8707(4)     | 7207(4)     | 4876(3)     | 11.1(9)  |
| N6   | 6262(4)     | 7420(4)     | 4897(2)     | 9.9(9)   |
| C5   | 6828(5)     | 8082(5)     | 4357(3)     | 12.6(11) |
| C6   | 9916(5)     | 7003(5)     | 4860(3)     | 14.3(11) |
| C7   | 10638(5)    | 7468(5)     | 4269(4)     | 18.2(12) |
| C9   | 5026(5)     | 7552(5)     | 4959(4)     | 16.7(11) |
| C10  | 8165(6)     | 7909(4)     | 4306(3)     | 12.2(11) |
| C11  | 10080(6)    | 8186(5)     | 3685(4)     | 21.5(13) |
| C12  | 4936(6)     | 8987(6)     | 3956(4)     | 29.5(15) |
| C13  | 6174(6)     | 8884(6)     | 3884(4)     | 23.2(14) |
| C14  | 4352(6)     | 8296(6)     | 4495(4)     | 25.8(14) |
| C4   | 8832(6)     | 8405(5)     | 3704(4)     | 18.7(12) |
| F1   | 8285(4)     | 13895(3)    | 8147(3)     | 26.3(8)  |
| F2   | 6218(4)     | 13668(3)    | 8097(3)     | 24.7(9)  |
| F3   | 7420(3)     | 12873(4)    | 9136(2)     | 32.8(10) |

Table 3 Anisotropic Displacement Parameters ( $\text{Å}^2 \times 10^3$ ) for 4. The Anisotropic displacement factor exponent takes the form:  $-2\pi^2[h^2a^{*2}U_{11}+2hka^*b^*U_{12}+\dots]$ .

| Atom | U <sub>11</sub> | U <sub>22</sub> | U <sub>33</sub> | U <sub>12</sub> | U <sub>13</sub> | U <sub>23</sub> |
|------|-----------------|-----------------|-----------------|-----------------|-----------------|-----------------|
| Pt1  | 9.98(18)        | 8.78(19)        | 3.17(18)        | -0.17(6)        | -0.31(11)       | 0.64(6)         |
| N0aa | 14(2)           | 13(2)           | 7(2)            | 0.8(18)         | -0.7(16)        | 1.7(17)         |
| C0aa | 11(2)           | 18(3)           | 7(2)            | -2(2)           | 1.1(18)         | -2(2)           |
| C1aa | 21(3)           | 14(3)           | 11(2)           | -4(2)           | -4(2)           | -7(2)           |

|      |          |          |         |          |          |          |
|------|----------|----------|---------|----------|----------|----------|
| C15  | 24(3)    | 13(3)    | 13(3)   | -5(2)    | -5(2)    | -1(2)    |
| C19  | 22(3)    | 18(3)    | 10(3)   | 7(3)     | 0(2)     | 0(2)     |
| C20  | 9(2)     | 21(3)    | 7(2)    | 6(2)     | -0.7(18) | -1(2)    |
| P1   | 11.1(6)  | 11.0(7)  | 10.0(6) | 0.5(5)   | 2.8(5)   | 1.4(5)   |
| F5   | 15.4(17) | 17.0(17) | 42(2)   | 4.5(14)  | 1.7(15)  | 2.2(16)  |
| F6   | 18.8(18) | 15.1(18) | 46(2)   | -3.8(15) | 0.9(16)  | 3.7(17)  |
| F9   | 30(2)    | 46(2)    | 9.4(16) | 0.5(18)  | 3.7(14)  | -2.9(16) |
| C2aa | 15(3)    | 18(3)    | 9(2)    | 2(2)     | -0.7(19) | -1(2)    |
| C8   | 20(3)    | 14(3)    | 10(2)   | -2(2)    | 2(2)     | 3(2)     |
| C3aa | 21(3)    | 18(3)    | 9(2)    | -4(2)    | -1(2)    | -1(2)    |
| N4   | 14(2)    | 14(2)    | 5.9(19) | 3.7(18)  | 2.1(16)  | -2.5(17) |
| N6   | 14(2)    | 10(2)    | 5.1(19) | 3.3(17)  | -4.0(15) | 2.2(17)  |
| C5   | 14(3)    | 19(3)    | 5(2)    | 6(2)     | -1.3(19) | 0(2)     |
| C6   | 18(3)    | 15(3)    | 10(2)   | -1(2)    | 2(2)     | 1(2)     |
| C7   | 11(3)    | 20(3)    | 24(3)   | 0(2)     | 5(2)     | -5(2)    |
| C9   | 11(2)    | 20(3)    | 19(3)   | 0(2)     | -0.2(19) | 7(2)     |
| C10  | 25(3)    | 7(3)     | 5(2)    | 4(2)     | 2(2)     | -1.8(19) |
| C11  | 29(3)    | 21(3)    | 16(3)   | 0(3)     | 11(2)    | 3(2)     |
| C12  | 28(3)    | 37(4)    | 24(3)   | 14(3)    | -1(3)    | 16(3)    |
| C13  | 25(4)    | 28(3)    | 16(3)   | 3(3)     | 6(3)     | 13(3)    |
| C14  | 15(3)    | 38(4)    | 24(3)   | 5(3)     | -6(2)    | 10(3)    |
| C4   | 25(3)    | 14(3)    | 17(3)   | 4(3)     | 0(2)     | 5(2)     |
| F1   | 21.0(19) | 20.1(17) | 38(2)   | -8.0(16) | 2.1(16)  | 0.5(18)  |
| F2   | 17(2)    | 16(2)    | 41(2)   | 5.8(13)  | 1.1(17)  | 1.1(14)  |
| F3   | 34(2)    | 55(3)    | 9.9(15) | -3.7(19) | 6.8(14)  | -0.3(18) |

Table 4 Bond Lengths for 4.

| Atom | Atom | Length/Å | Atom | Atom | Length/Å  |
|------|------|----------|------|------|-----------|
| Pt1  | N0aa | 2.176(5) | P1   | F2   | 1.597(4)  |
| Pt1  | C2aa | 2.045(5) | P1   | F3   | 1.598(4)  |
| Pt1  | C8   | 2.050(5) | N4   | C6   | 1.342(7)  |
| Pt1  | C3aa | 2.039(6) | N4   | C10  | 1.352(7)  |
| Pt1  | N4   | 2.166(4) | N6   | C5   | 1.355(7)  |
| Pt1  | N6   | 2.162(4) | N6   | C9   | 1.367(7)  |
| N0aa | C0aa | 1.349(7) | C5   | C10  | 1.480(9)  |
| N0aa | C20  | 1.347(7) | C5   | C13  | 1.396(9)  |
| C0aa | C15  | 1.392(8) | C6   | C7   | 1.387(8)  |
| C1aa | C15  | 1.373(9) | C7   | C11  | 1.385(9)  |
| C1aa | C19  | 1.397(8) | C9   | C14  | 1.352(9)  |
| C19  | C20  | 1.389(8) | C10  | C4   | 1.380(8)  |
| P1   | F5   | 1.610(4) | C11  | C4   | 1.389(9)  |
| P1   | F6   | 1.609(4) | C12  | C13  | 1.368(10) |

|    |    |          |     |     |           |
|----|----|----------|-----|-----|-----------|
| P1 | F9 | 1.589(3) | C12 | C14 | 1.385(10) |
| P1 | F1 | 1.604(4) |     |     |           |

Table 5 Bond Angles for 4.

| Atom | Atom | Atom | Angle/°    | Atom | Atom | Atom | Angle/°   |
|------|------|------|------------|------|------|------|-----------|
| C2aa | Pt1  | N0aa | 91.81(19)  | F2   | P1   | F5   | 179.7(2)  |
| C8   | Pt1  | N0aa | 92.26(19)  | F2   | P1   | F6   | 89.63(19) |
| C8   | Pt1  | C2aa | 86.0(2)    | F2   | P1   | F9   | 90.5(2)   |
| C3aa | Pt1  | N0aa | 179.19(19) | F2   | P1   | F1   | 90.2(2)   |
| C3aa | Pt1  | C2aa | 87.5(2)    | F3   | P1   | F5   | 89.7(2)   |
| C3aa | Pt1  | C8   | 87.3(2)    | F3   | P1   | F6   | 90.0(2)   |
| N4   | Pt1  | N0aa | 90.82(16)  | F3   | P1   | F9   | 179.4(2)  |
| N4   | Pt1  | C2aa | 97.36(19)  | F3   | P1   | F1   | 89.8(2)   |
| N4   | Pt1  | C8   | 175.38(19) | F3   | P1   | F2   | 90.1(2)   |
| N4   | Pt1  | C3aa | 89.70(19)  | C6   | N4   | Pt1  | 125.1(4)  |
| N6   | Pt1  | N0aa | 87.42(16)  | C10  | N4   | Pt1  | 115.3(4)  |
| N6   | Pt1  | C2aa | 173.87(19) | C10  | N4   | C6   | 119.3(5)  |
| N6   | Pt1  | C8   | 100.1(2)   | C5   | N6   | Pt1  | 115.3(3)  |
| N6   | Pt1  | C3aa | 93.31(19)  | C9   | N6   | Pt1  | 126.4(4)  |
| N6   | Pt1  | N4   | 76.57(17)  | C9   | N6   | C5   | 118.0(5)  |
| C0aa | N0aa | Pt1  | 120.2(3)   | C10  | C5   | N6   | 116.3(5)  |
| C20  | N0aa | Pt1  | 121.1(4)   | C13  | C5   | N6   | 121.1(5)  |
| C20  | N0aa | C0aa | 118.7(5)   | C13  | C5   | C10  | 122.6(5)  |
| C15  | C0aa | N0aa | 121.8(5)   | C7   | C6   | N4   | 122.7(5)  |
| C19  | C1aa | C15  | 118.7(5)   | C11  | C7   | C6   | 117.9(5)  |
| C1aa | C15  | C0aa | 119.6(5)   | C14  | C9   | N6   | 122.8(5)  |
| C20  | C19  | C1aa | 119.0(5)   | C5   | C10  | N4   | 116.2(5)  |
| C19  | C20  | N0aa | 122.1(5)   | C4   | C10  | N4   | 121.0(5)  |
| F6   | P1   | F5   | 90.52(19)  | C4   | C10  | C5   | 122.8(5)  |
| F9   | P1   | F5   | 89.8(2)    | C4   | C11  | C7   | 119.6(5)  |
| F9   | P1   | F6   | 90.2(2)    | C14  | C12  | C13  | 119.5(6)  |
| F1   | P1   | F5   | 89.7(2)    | C12  | C13  | C5   | 119.4(6)  |
| F1   | P1   | F6   | 179.7(2)   | C12  | C14  | C9   | 119.1(6)  |
| F1   | P1   | F9   | 90.0(2)    | C11  | C4   | C10  | 119.6(6)  |

Table 6 Hydrogen Atom Coordinates ( $\text{\AA} \times 10^4$ ) and Isotropic Displacement Parameters ( $\text{\AA}^2 \times 10^3$ ) for 4.

| Atom | x        | y       | z       | U(eq)    |
|------|----------|---------|---------|----------|
| H9   | 4633(5)  | 7112(5) | 5337(4) | 20.1(14) |
| H14  | 3507(6)  | 8342(6) | 4537(4) | 31.0(16) |
| H13  | 6576(6)  | 9343(6) | 3524(4) | 27.9(16) |
| H6   | 10284(5) | 6531(5) | 5261(3) | 17.2(13) |

|      |          |          |          |          |
|------|----------|----------|----------|----------|
| H7   | 11471(5) | 7303(5)  | 4264(4)  | 21.8(14) |
| H11  | 10538(6) | 8520(5)  | 3284(4)  | 25.8(15) |
| H4   | 8448(6)  | 8883(5)  | 3313(4)  | 22.4(14) |
| H0aa | 9404(5)  | 7943(5)  | 6507(3)  | 14.3(12) |
| H20  | 5876(5)  | 7732(5)  | 6835(3)  | 15.0(13) |
| H19  | 5989(6)  | 9227(5)  | 7738(3)  | 20.2(14) |
| H1aa | 7897(5)  | 10067(5) | 8064(3)  | 18.3(13) |
| H15  | 9595(6)  | 9439(5)  | 7408(4)  | 20.4(15) |
| H3aa | 8040(20) | 5090(20) | 4502(18) | 24.5(17) |
| H3ab | 7300(40) | 4401(5)  | 5132(3)  | 24.5(17) |
| H3ac | 6600(20) | 5170(20) | 4473(18) | 24.5(17) |
| H2aa | 8365(5)  | 4970(30) | 6726(19) | 21.0(16) |
| H2ab | 9220(30) | 5010(30) | 5972(4)  | 21.0(16) |
| H2ac | 9310(20) | 5939(5)  | 6660(20) | 21.0(16) |
| H8a  | 6360(20) | 4766(5)  | 6320(20) | 21.8(17) |
| H8b  | 6270(30) | 5790(30) | 6908(7)  | 21.8(17) |
| H8c  | 5392(6)  | 5700(30) | 6094(17) | 21.8(17) |
| H12  | 4489(6)  | 9518(6)  | 3645(4)  | 35.4(18) |

## Experimental

Single crystals of C<sub>20</sub>H<sub>20</sub>N<sub>3</sub>F<sub>6</sub>PPt **4** were grown from MeCN/water. A suitable crystal was selected and mounted on a SuperNova, Dual, Cu at zero, AtlasS2 diffractometer. The crystal was kept at 100.00(10) K during data collection. Using Olex2 [1], the structure was solved with the olex2.solve [2] structure solution program using Charge Flipping and refined with the olex2.refine [3] refinement package using Gauss-Newton minimisation.

1. Dolomanov, O.V., Bourhis, L.J., Gildea, R.J., Howard, J.A.K. & Puschmann, H. (2009), *J. Appl. Cryst.* 42, 339-341.
2. Bourhis, L.J., Dolomanov, O.V., Gildea, R.J., Howard, J.A.K., Puschmann, H. (2015). *Acta Cryst.* A71, 59-75.
3. Bourhis, L.J., Dolomanov, O.V., Gildea, R.J., Howard, J.A.K., Puschmann, H. (2015). *Acta Cryst.* A71, 59-75.

## Crystal structure determination of **4**

**Crystal Data** for C<sub>20</sub>H<sub>20</sub>N<sub>3</sub>F<sub>6</sub>PPt ( $M = 620.44$  g/mol): monoclinic, space group P2<sub>1</sub>/c (no. 14),  $a = 10.9042(2)$  Å,  $b = 12.0936(3)$  Å,  $c = 15.9712(3)$  Å,  $\beta = 93.7300(16)^\circ$ ,  $V = 2101.68(7)$  Å<sup>3</sup>,  $Z = 4$ ,  $T = 100.00(10)$  K,  $\mu(\text{Cu K}\alpha) = 13.782$  mm<sup>-1</sup>,  $D_{\text{calc}} = 1.9607$  g/cm<sup>3</sup>, 6810 reflections measured ( $8.12^\circ \leq 2\theta \leq 145.98^\circ$ ), 3990 unique ( $R_{\text{int}} = 0.0315$ ,  $R_{\text{sigma}} = 0.0354$ ) which were used in all calculations. The final  $R_1$  was 0.0394 ( $I \geq 2u(I)$ ) and  $wR_2$  was 0.1252 (all data).

## Refinement model description

Number of restraints - 0, number of constraints - 38.

Details:

1. Fixed Uiso
  - At 1.2 times of:
    - All C(H) groups
  - At 1.5 times of:
    - All C(H,H,H) groups
- 2.a Aromatic/amide H refined with riding coordinates:
  - C9(H9), C14(H14), C13(H13), C6(H6), C7(H7), C11(H11), C4(H4), C0aa(H0aa),
  - C20(H20), C19(H19), C1aa(H1aa), C15(H15), C12(H12)
- 2.b Idealised Me refined as rotating group:
  - C3aa(H3aa,H3ab,H3ac), C2aa(H2aa,H2ab,H2ac), C8(H8a,H8b,H8c)

### Crystallographic data for **5**

Table 1 Crystal data and structure refinement for **5**.

|                                             |                                                                    |
|---------------------------------------------|--------------------------------------------------------------------|
| Identification code                         | <b>5</b>                                                           |
| Empirical formula                           | C <sub>18</sub> H <sub>23</sub> N <sub>3</sub> OF <sub>6</sub> PPt |
| Formula weight                              | 648.45                                                             |
| Temperature/K                               | 99.98(13)                                                          |
| Crystal system                              | triclinic                                                          |
| Space group                                 | P-1                                                                |
| a/Å                                         | 9.1410(4)                                                          |
| b/Å                                         | 9.5731(4)                                                          |
| c/Å                                         | 13.2139(6)                                                         |
| α/°                                         | 108.296(4)                                                         |
| β/°                                         | 97.486(4)                                                          |
| γ/°                                         | 95.712(3)                                                          |
| Volume/Å <sup>3</sup>                       | 1076.32(9)                                                         |
| Z                                           | 2                                                                  |
| ρ <sub>calc</sub> /cm <sup>3</sup>          | 2.0007                                                             |
| μ/mm <sup>-1</sup>                          | 13.529                                                             |
| F(000)                                      | 617.9                                                              |
| Crystal size/mm <sup>3</sup>                | 0.1742 × 0.1256 × 0.0673                                           |
| Radiation                                   | Cu Kα (λ = 1.54184)                                                |
| 2θ range for data collection/°              | 7.16 to 146.02                                                     |
| Index ranges                                | -10 ≤ h ≤ 10, -11 ≤ k ≤ 11, -10 ≤ l ≤ 16                           |
| Reflections collected                       | 6376                                                               |
| Independent reflections                     | 4066 [R <sub>int</sub> = 0.0205, R <sub>sigma</sub> = 0.0304]      |
| Data/restraints/parameters                  | 4066/0/283                                                         |
| Goodness-of-fit on F <sup>2</sup>           | 0.673                                                              |
| Final R indexes [I ≥ 2σ (I)]                | R <sub>1</sub> = 0.0211, wR <sub>2</sub> = 0.0723                  |
| Final R indexes [all data]                  | R <sub>1</sub> = 0.0227, wR <sub>2</sub> = 0.0755                  |
| Largest diff. peak/hole / e Å <sup>-3</sup> | 1.01/-1.48                                                         |

Table 2 Fractional Atomic Coordinates ( $\times 10^4$ ) and Equivalent Isotropic Displacement Parameters ( $\text{\AA}^2 \times 10^3$ ) for 5.  $U_{eq}$  is defined as 1/3 of the trace of the orthogonalised  $U_{ij}$  tensor.

| Atom | x          | y          | z           | U(eq)     |
|------|------------|------------|-------------|-----------|
| Pt1  | -35.63(12) | 481.42(12) | 7476.61(9)  | 14.37(8)  |
| N5   | -924(3)    | 1898(3)    | 6612(2)     | 14.9(6)   |
| N6   | 714(3)     | 2406(4)    | 8926(2)     | 14.7(6)   |
| N7   | -1944(4)   | 651(3)     | 8288(3)     | 15.9(6)   |
| C2aa | -3280(4)   | -209(4)    | 7887(3)     | 18.8(7)   |
| C3aa | -4342(4)   | 1235(4)    | 9346(3)     | 21.1(7)   |
| C4aa | 157(4)     | 3698(4)    | 10663(3)    | 18.0(7)   |
| C0aa | -263(4)    | 2659(4)    | 9622(3)     | 15.9(6)   |
| C16  | -2957(4)   | 2099(4)    | 9785(3)     | 18.6(7)   |
| C1aa | -1767(4)   | 1793(4)    | 9234(3)     | 15.2(6)   |
| C20  | -4491(4)   | 47(4)      | 8401(3)     | 20.7(7)   |
| C5aa | 2087(4)    | 3180(4)    | 9235(3)     | 18.2(7)   |
| C6aa | 2580(4)    | 4229(4)    | 10250(3)    | 19.9(7)   |
| C18  | -874(5)    | -1451(5)   | 6219(3)     | 24.8(8)   |
| C19  | 841(5)     | -807(5)    | 8313(3)     | 24.1(8)   |
| C10  | -52(4)     | 3115(4)    | 6629(3)     | 17.7(7)   |
| C11  | -2937(4)   | 2554(4)    | 5591(3)     | 17.1(7)   |
| C12  | -2341(4)   | 1613(4)    | 6087(3)     | 15.7(6)   |
| C13  | -570(4)    | 4110(4)    | 6146(3)     | 19.9(7)   |
| C14  | 1832(5)    | 432(5)     | 6769(3)     | 23.0(8)   |
| C15  | 1608(4)    | 4472(4)    | 10988(3)    | 22.5(7)   |
| C17  | -2045(4)   | 3839(4)    | 5633(3)     | 17.5(7)   |
| P1   | 5849.5(9)  | 4441.8(9)  | 12699.8(7)  | 15.47(17) |
| F5   | 7271(3)    | 4601(3)    | 12133.2(18) | 34.4(6)   |
| F6   | 4439(3)    | 4275(3)    | 13273(2)    | 35.5(6)   |
| F1   | 6743(2)    | 5635(2)    | 13806.3(17) | 24.5(5)   |
| F2   | 4969(2)    | 3240(2)    | 11592.9(17) | 24.4(4)   |
| F3   | 6485(3)    | 3134(2)    | 13063.1(18) | 28.6(5)   |
| F4   | 5240(3)    | 5765(3)    | 12355(2)    | 37.5(6)   |
| O1   | -5497(3)   | 1494(3)    | 5540(2)     | 23.4(5)   |
| C2   | -4540(4)   | 2110(4)    | 4981(3)     | 20.2(7)   |

Table 3 Anisotropic Displacement Parameters ( $\text{\AA}^2 \times 10^3$ ) for 5. The Anisotropic displacement factor exponent takes the form:  $-2\pi^2[h^2a^2U_{11}+2hka*b*U_{12}+\dots]$ .

| Atom | U <sub>11</sub> | U <sub>22</sub> | U <sub>33</sub> | U <sub>12</sub> | U <sub>13</sub> | U <sub>23</sub> |
|------|-----------------|-----------------|-----------------|-----------------|-----------------|-----------------|
| Pt1  | 16.40(11)       | 14.98(11)       | 13.09(11)       | 4.48(7)         | 3.72(7)         | 5.44(7)         |
| N5   | 17.6(15)        | 16.9(15)        | 12.1(14)        | 4.9(11)         | 3.6(11)         | 6.2(11)         |
| N6   | 12.6(14)        | 18.6(15)        | 13.4(14)        | 3.7(11)         | 1.8(11)         | 5.7(11)         |
| N7   | 20.1(15)        | 13.8(14)        | 14.9(14)        | 2.4(12)         | 5.0(12)         | 5.4(12)         |
| C2aa | 20.2(17)        | 15.1(16)        | 18.9(16)        | -2.4(13)        | 0.3(13)         | 5.4(13)         |

|      |          |          |          |          |          |          |
|------|----------|----------|----------|----------|----------|----------|
| C3aa | 20.0(17) | 22.2(18) | 24.7(18) | 2.3(14)  | 7.4(14)  | 11.8(15) |
| C4aa | 22.1(17) | 19.9(17) | 14.0(15) | 3.0(13)  | 1.6(13)  | 9.2(13)  |
| C0aa | 17.8(16) | 16.9(16) | 16.4(15) | 4.3(13)  | 0.9(12)  | 10.7(13) |
| C16  | 26.8(18) | 18.5(16) | 11.2(15) | 4.9(13)  | 3.7(13)  | 5.3(13)  |
| C1aa | 15.6(16) | 15.7(16) | 17.0(15) | 3.5(12)  | 4.5(12)  | 8.4(13)  |
| C20  | 20.6(17) | 19.1(17) | 20.2(17) | -3.3(13) | 1.1(14)  | 6.3(14)  |
| C5aa | 15.7(16) | 19.4(17) | 21.1(17) | 2.7(13)  | 3.3(13)  | 9.0(14)  |
| C6aa | 15.3(16) | 26.0(18) | 19.7(17) | 0.2(13)  | -1.3(13) | 12.1(14) |
| C18  | 32(2)    | 20.4(19) | 20.8(19) | 8.4(16)  | 3.6(16)  | 4.8(15)  |
| C19  | 33(2)    | 25(2)    | 22(2)    | 11.6(17) | 3.8(16)  | 15.9(17) |
| C10  | 18.3(16) | 20.7(17) | 12.6(15) | 2.8(13)  | 1.0(12)  | 4.2(13)  |
| C11  | 18.0(16) | 18.2(16) | 14.8(15) | 4.5(13)  | 4.5(13)  | 4.0(13)  |
| C12  | 18.3(16) | 14.9(15) | 14.2(15) | 3.4(12)  | 5.4(12)  | 4.1(12)  |
| C13  | 21.6(17) | 18.5(17) | 18.7(16) | -1.7(13) | 2.2(13)  | 6.7(13)  |
| C14  | 20.9(19) | 32(2)    | 19.9(18) | 10.4(16) | 11.7(15) | 8.6(16)  |
| C15  | 23.6(18) | 20.1(17) | 20.1(17) | -2.3(14) | -2.9(14) | 5.6(14)  |
| C17  | 19.7(17) | 16.2(16) | 18.5(16) | 2.9(13)  | 5.8(13)  | 7.1(13)  |
| P1   | 15.6(4)  | 13.9(4)  | 14.2(4)  | 2.0(3)   | 1.2(3)   | 1.5(3)   |
| F5   | 31.9(12) | 35.8(13) | 26.0(12) | -10(1)   | 14.3(10) | -2.1(10) |
| F6   | 25.3(12) | 39.9(14) | 38.4(14) | 1.3(10)  | 17.3(10) | 5.1(11)  |
| F1   | 26.7(11) | 21.9(11) | 19(1)    | 4.0(9)   | 2.8(8)   | -1.3(8)  |
| F2   | 25.0(11) | 21.1(11) | 20.9(10) | -0.2(8)  | -3.7(8)  | 2.5(8)   |
| F3   | 35.6(13) | 22.1(11) | 26.0(11) | 9.2(9)   | -1.9(9)  | 6.6(9)   |
| F4   | 54.4(15) | 21.5(11) | 31.1(13) | 6.9(11)  | -9.2(11) | 7.5(10)  |
| O1   | 18.6(12) | 20.6(13) | 28.9(14) | 1.1(10)  | 7.3(10)  | 4.6(10)  |
| C2   | 13.9(16) | 25.5(18) | 21.5(17) | 2.8(13)  | 1.8(13)  | 8.8(14)  |

Table 4 Bond Lengths for 5.

| Atom | Atom | Length/Å | Atom | Atom | Length/Å |
|------|------|----------|------|------|----------|
| Pt1  | N5   | 2.180(3) | C0aa | C1aa | 1.471(5) |
| Pt1  | N6   | 2.174(3) | C16  | C1aa | 1.391(5) |
| Pt1  | N7   | 2.157(3) | C5aa | C6aa | 1.385(5) |
| Pt1  | C18  | 2.056(4) | C6aa | C15  | 1.385(5) |
| Pt1  | C19  | 2.051(4) | C10  | C13  | 1.389(5) |
| Pt1  | C14  | 2.048(4) | C11  | C12  | 1.383(5) |
| N5   | C10  | 1.337(5) | C11  | C17  | 1.389(5) |
| N5   | C12  | 1.346(5) | C11  | C2   | 1.527(5) |
| N6   | C0aa | 1.349(5) | C13  | C17  | 1.388(5) |
| N6   | C5aa | 1.335(5) | P1   | F5   | 1.599(2) |
| N7   | C2aa | 1.345(5) | P1   | F6   | 1.597(2) |
| N7   | C1aa | 1.356(5) | P1   | F1   | 1.601(2) |
| C2aa | C20  | 1.375(5) | P1   | F2   | 1.601(2) |



|      |      |          |    |    |          |
|------|------|----------|----|----|----------|
| C3aa | C16  | 1.387(5) | P1 | F3 | 1.608(2) |
| C3aa | C20  | 1.380(5) | P1 | F4 | 1.600(3) |
| C4aa | C0aa | 1.398(5) | O1 | C2 | 1.413(4) |
| C4aa | C15  | 1.396(5) |    |    |          |

Table 5 Bond Angles for 5.

| Atom | Atom | Atom | Angle/°    | Atom | Atom | Atom | Angle/°    |
|------|------|------|------------|------|------|------|------------|
| N6   | Pt1  | N5   | 90.47(11)  | C0aa | C1aa | N7   | 115.9(3)   |
| N7   | Pt1  | N5   | 88.58(12)  | C16  | C1aa | N7   | 120.8(3)   |
| N7   | Pt1  | N6   | 76.58(11)  | C16  | C1aa | C0aa | 123.3(3)   |
| C18  | Pt1  | N5   | 93.58(14)  | C3aa | C20  | C2aa | 119.3(3)   |
| C18  | Pt1  | N6   | 173.18(13) | C6aa | C5aa | N6   | 123.3(3)   |
| C18  | Pt1  | N7   | 98.01(15)  | C15  | C6aa | C5aa | 118.4(3)   |
| C19  | Pt1  | N5   | 178.54(12) | C13  | C10  | N5   | 122.3(3)   |
| C19  | Pt1  | N6   | 88.28(15)  | C17  | C11  | C12  | 119.0(3)   |
| C19  | Pt1  | N7   | 91.86(15)  | C2   | C11  | C12  | 118.6(3)   |
| C19  | Pt1  | C18  | 87.73(17)  | C2   | C11  | C17  | 122.3(3)   |
| C14  | Pt1  | N5   | 91.03(15)  | C11  | C12  | N5   | 122.4(3)   |
| C14  | Pt1  | N6   | 100.25(14) | C17  | C13  | C10  | 119.0(3)   |
| C14  | Pt1  | N7   | 176.80(12) | C6aa | C15  | C4aa | 118.7(3)   |
| C14  | Pt1  | C18  | 85.18(17)  | C13  | C17  | C11  | 118.6(3)   |
| C14  | Pt1  | C19  | 88.45(18)  | F6   | P1   | F5   | 179.44(16) |
| C10  | N5   | Pt1  | 119.3(2)   | F1   | P1   | F5   | 89.76(12)  |
| C12  | N5   | Pt1  | 122.1(2)   | F1   | P1   | F6   | 90.03(12)  |
| C12  | N5   | C10  | 118.6(3)   | F2   | P1   | F5   | 89.93(12)  |
| C0aa | N6   | Pt1  | 114.3(2)   | F2   | P1   | F6   | 90.28(13)  |
| C5aa | N6   | Pt1  | 125.7(2)   | F2   | P1   | F1   | 179.50(13) |
| C5aa | N6   | C0aa | 119.2(3)   | F3   | P1   | F5   | 89.65(14)  |
| C2aa | N7   | Pt1  | 124.9(2)   | F3   | P1   | F6   | 89.83(14)  |
| C1aa | N7   | Pt1  | 115.4(2)   | F3   | P1   | F1   | 89.51(12)  |
| C1aa | N7   | C2aa | 119.5(3)   | F3   | P1   | F2   | 90.10(12)  |
| C20  | C2aa | N7   | 121.9(3)   | F4   | P1   | F5   | 90.05(16)  |
| C20  | C3aa | C16  | 119.2(3)   | F4   | P1   | F6   | 90.46(16)  |
| C15  | C4aa | C0aa | 119.6(3)   | F4   | P1   | F1   | 89.48(12)  |
| C4aa | C0aa | N6   | 120.7(3)   | F4   | P1   | F2   | 90.92(12)  |
| C1aa | C0aa | N6   | 116.9(3)   | F4   | P1   | F3   | 178.94(13) |
| C1aa | C0aa | C4aa | 122.3(3)   | O1   | C2   | C11  | 112.1(3)   |
| C1aa | C16  | C3aa | 119.2(3)   |      |      |      |            |

Table 6 Hydrogen Atom Coordinates ( $\text{\AA}\times 10^4$ ) and Isotropic Displacement Parameters ( $\text{\AA}^2\times 10^3$ ) for 5.

| Atom | x         | y         | z        | U(eq)    |
|------|-----------|-----------|----------|----------|
| H10  | 935(4)    | 3303(4)   | 6976(3)  | 21.2(8)  |
| H12  | -2941(4)  | 752(4)    | 6056(3)  | 18.8(8)  |
| H17  | -2427(4)  | 4504(4)   | 5324(3)  | 21.0(8)  |
| H13  | 63(4)     | 4945(4)   | 6166(3)  | 23.9(8)  |
| H5aa | 2745(4)   | 3006(4)   | 8743(3)  | 21.8(8)  |
| H6aa | 3540(4)   | 4758(4)   | 10432(3) | 23.8(8)  |
| H15  | 1916(4)   | 5138(4)   | 11686(3) | 27.0(9)  |
| H4aa | -526(4)   | 3873(4)   | 11135(3) | 21.6(8)  |
| H2aa | -3389(4)  | -1000(4)  | 7243(3)  | 22.5(8)  |
| H16  | -2825(4)  | 2874(4)   | 10439(3) | 22.3(8)  |
| H3aa | -5162(4)  | 1455(4)   | 9684(3)  | 25.3(9)  |
| H20  | -5399(4)  | -575(4)   | 8116(3)  | 24.8(8)  |
| H18a | -1480(30) | -1224(6)  | 5660(11) | 37.2(13) |
| H18b | -64(5)    | -1917(19) | 5934(17) | 37.2(13) |
| H18c | -1460(30) | -2113(15) | 6476(6)  | 37.2(13) |
| H14a | 1581(8)   | 500(30)   | 6059(10) | 34.4(12) |
| H14b | 2578(13)  | 1255(19)  | 7202(13) | 34.4(12) |
| H14c | 2210(20)  | -484(15)  | 6710(20) | 34.4(12) |
| H19a | 1745(19)  | -265(13)  | 8789(18) | 36.1(13) |
| H19b | 134(14)   | -1060(30) | 8728(19) | 36.1(13) |
| H19c | 1060(30)  | -1702(16) | 7812(4)  | 36.1(13) |
| H1   | -5700(50) | 2163(6)   | 6040(30) | 35.1(8)  |

## Experimental

Single crystals of  $\text{C}_{18}\text{H}_{23}\text{N}_3\text{OF}_6\text{PPt}$  [5] were grown from MeCN water. A suitable crystal was selected and mounted on a SuperNova, Dual, Cu at zero, AtlasS2 diffractometer. The crystal was kept at 99.98(13) K during data collection. Using Olex2 [1], the structure was solved with the olex2.solve [2] structure solution program using Charge Flipping and refined with the olex2.refine [3] refinement package using Gauss-Newton minimisation.

1. Dolomanov, O.V., Bourhis, L.J., Gildea, R.J., Howard, J.A.K. & Puschmann, H. (2009), *J. Appl. Cryst.* 42, 339-341.
2. Bourhis, L.J., Dolomanov, O.V., Gildea, R.J., Howard, J.A.K., Puschmann, H. (2015). *Acta Cryst.* A71, 59-75.
3. Bourhis, L.J., Dolomanov, O.V., Gildea, R.J., Howard, J.A.K., Puschmann, H. (2015). *Acta Cryst.* A71, 59-75.

## Crystal structure determination of [5]

**Crystal Data** for  $\text{C}_{18}\text{H}_{23}\text{N}_3\text{OF}_6\text{PPt}$  ( $M = 648.45$  g/mol): triclinic, space group P-1 (no. 2),  $a = 9.1410(4)$   $\text{\AA}$ ,  $b = 9.5731(4)$   $\text{\AA}$ ,  $c = 13.2139(6)$   $\text{\AA}$ ,  $\alpha = 108.296(4)^\circ$ ,  $\beta = 97.486(4)^\circ$ ,  $\gamma = 95.712(3)^\circ$ ,  $V = 1076.32(9)$   $\text{\AA}^3$ ,  $Z = 2$ ,  $T = 99.98(13)$  K,  $\mu(\text{Cu K}\alpha) = 13.529$   $\text{mm}^{-1}$ ,  $D_{\text{calc}} = 2.0007$   $\text{g/cm}^3$ , 6376 reflections measured ( $7.16^\circ \leq 2\theta \leq 146.02^\circ$ ), 4066 unique ( $R_{\text{int}} = 0.0205$ ,  $R_{\text{sigma}} = 0.0304$ ) which were used in all calculations. The final  $R_1$  was 0.0211 ( $I \geq 2u(I)$ ) and  $wR_2$  was 0.0755 (all data).

## Refinement model description

Number of restraints - 0, number of constraints - 38.

### Details:

#### 1. Fixed Uiso

At 1.2 times of:

All C(H) groups

At 1.5 times of:

All C(H,H,H) groups, All O(H) groups

#### 2.a Aromatic/amide H refined with riding coordinates:

C10(H10), C12(H12), C17(H17), C13(H13), C5aa(H5aa), C6aa(H6aa),  
C15(H15),

C4aa(H4aa), C2aa(H2aa), C16(H16), C3aa(H3aa), C20(H20)

#### 2.b Idealised Me refined as rotating group:

C18(H18a,H18b,H18c), C14(H14a,H14b,H14c), C19(H19a,H19b,H19c)

#### 2.c Idealised tetrahedral OH refined as rotating group:

### Crystallographic data for 6.

Table 1 Crystal data and structure refinement for 6.

|                                    |                                                                                  |
|------------------------------------|----------------------------------------------------------------------------------|
| Identification code                | 6                                                                                |
| Empirical formula                  | C <sub>21</sub> H <sub>26</sub> N <sub>3</sub> O <sub>2</sub> F <sub>6</sub> PPt |
| Formula weight                     | 677.47                                                                           |
| Temperature/K                      | 289.33(10)                                                                       |
| Crystal system                     | monoclinic                                                                       |
| Space group                        | P2 <sub>1</sub> /n                                                               |
| a/Å                                | 10.94969(19)                                                                     |
| b/Å                                | 14.3600(2)                                                                       |
| c/Å                                | 15.7460(3)                                                                       |
| α/°                                | 90                                                                               |
| β/°                                | 96.7748(17)                                                                      |
| γ/°                                | 90                                                                               |
| Volume/Å <sup>3</sup>              | 2458.57(8)                                                                       |
| Z                                  | 4                                                                                |
| ρ <sub>calc</sub> /cm <sup>3</sup> | 1.8301                                                                           |
| μ/mm <sup>-1</sup>                 | 11.910                                                                           |
| F(000)                             | 1296.1                                                                           |
| Crystal size/mm <sup>3</sup>       | 0.15 x 0.2 x 0.25                                                                |
| Radiation                          | Cu Kα (λ = 1.54184)                                                              |
| 2θ range for data collection/°     | 8.36 to 148.4                                                                    |
| Index ranges                       | -9 ≤ h ≤ 13, -11 ≤ k ≤ 17, -19 ≤ l ≤ 19                                          |
| Reflections collected              | 8172                                                                             |
| Independent reflections            | 4766 [R <sub>int</sub> = 0.0252, R <sub>sigma</sub> = 0.0371]                    |
| Data/restraints/parameters         | 4766/0/301                                                                       |
| Goodness-of-fit on F <sup>2</sup>  | 1.040                                                                            |
| Final R indexes [I ≥ 2σ (I)]       | R <sub>1</sub> = 0.0366, wR <sub>2</sub> = 0.1226                                |

Final R indexes [all data]  $R_1 = 0.0421$ ,  $wR_2 = 0.1323$

Largest diff. peak/hole /  $e \text{ \AA}^{-3}$  6.63/-0.85

Table 2 Fractional Atomic Coordinates ( $\times 10^4$ ) and Equivalent Isotropic Displacement Parameters ( $\text{\AA}^2 \times 10^3$ ) for 6.  $U_{eq}$  is defined as 1/3 of of the trace of the orthogonalised  $U_{ij}$  tensor.

| Atom | x           | y           | z           | U(eq)     |
|------|-------------|-------------|-------------|-----------|
| Pt1  | 3963.26(19) | 6664.78(15) | 2732.22(13) | 10.96(13) |
| N0aa | 1996(5)     | 6533(3)     | 2750(3)     | 13.4(10)  |
| C0aa | 5797(6)     | 6855(5)     | 2648(4)     | 20.7(13)  |
| N13  | 3880(4)     | 7888(3)     | 3546(3)     | 14.6(10)  |
| N1aa | 3196(4)     | 7517(3)     | 1669(3)     | 13.1(9)   |
| C2aa | 4547(5)     | 5836(4)     | 3751(4)     | 16.7(11)  |
| C10  | 1377(6)     | 8256(4)     | 1006(4)     | 18.2(13)  |
| C11  | 1966(5)     | 7623(4)     | 1596(3)     | 12.1(10)  |
| C22  | 4101(6)     | 9539(4)     | 3778(4)     | 18.1(12)  |
| C1aa | 1284(5)     | 7059(4)     | 2172(4)     | 16.2(11)  |
| C15  | 3845(5)     | 7974(4)     | 1139(4)     | 16.3(11)  |
| C17  | 2065(6)     | 8733(5)     | 466(4)      | 20.8(13)  |
| C19  | 3349(6)     | 8580(5)     | 540(4)      | 21.6(13)  |
| C20  | 1456(6)     | 5997(4)     | 3283(4)     | 18.7(12)  |
| C24  | 4295(5)     | 8733(4)     | 3320(4)     | 15.5(12)  |
| C25  | 3069(6)     | 8614(5)     | 4735(4)     | 21.3(12)  |
| C27  | 26(6)       | 7043(4)     | 2118(4)     | 18.9(12)  |
| C30  | 3298(6)     | 7841(4)     | 4247(4)     | 18.7(12)  |
| C33  | 193(6)      | 5943(5)     | 3278(4)     | 21.1(13)  |
| C3aa | 3464(6)     | 9481(4)     | 4490(4)     | 17.0(12)  |
| C14  | 4037(6)     | 5509(4)     | 1981(4)     | 19.7(12)  |
| O9   | 3524(5)     | 11114(3)    | 4727(3)     | 29.1(11)  |
| O10  | 2587(5)     | 10193(4)    | 5596(3)     | 35.0(12)  |
| C12  | 3210(6)     | 10360(5)    | 4941(4)     | 22.8(13)  |
| C13  | 2173(9)     | 11013(7)    | 6061(6)     | 50(3)     |
| C9   | -536(6)     | 6472(5)     | 2687(4)     | 21.7(13)  |
| P1   | 7289.2(14)  | 9046.6(10)  | 1153.2(9)   | 14.0(3)   |
| F0aa | 6331(3)     | 9015(3)     | 1845(2)     | 22.3(8)   |
| F8   | 6179(4)     | 9170(3)     | 406(2)      | 32.0(9)   |
| F1aa | 7383(3)     | 10157(2)    | 1253(2)     | 21.4(7)   |
| F3   | 8411(3)     | 8923(3)     | 1898(2)     | 28.5(9)   |
| F4   | 7189(4)     | 7937(3)     | 1044(3)     | 32.9(10)  |
| F1   | 8244(3)     | 9078(3)     | 453(2)      | 24.4(8)   |

Table 3 Anisotropic Displacement Parameters ( $\text{\AA}^2 \times 10^3$ ) for 6. The Anisotropic displacement factor exponent takes the form:  $-2\pi^2[h^2a^{*2}U_{11}+2hka^*b^*U_{12}+\dots]$ .

| Atom | $U_{11}$ | $U_{22}$  | $U_{33}$  | $U_{12}$ | $U_{13}$ | $U_{23}$ |
|------|----------|-----------|-----------|----------|----------|----------|
| Pt1  | 7.85(17) | 12.72(17) | 12.31(18) | 0.39(7)  | 1.16(11) | 2.86(7)  |
| N0aa | 9(2)     | 14(2)     | 17(3)     | -1.0(18) | -0.0(19) | 3.7(19)  |
| C0aa | 9(3)     | 27(3)     | 26(3)     | -3(2)    | 1(2)     | 6(3)     |
| N13  | 14(2)    | 13(2)     | 16(2)     | 0.1(19)  | -1.2(18) | 2.4(19)  |
| N1aa | 14(2)    | 13(2)     | 12(2)     | 1.8(18)  | -0.6(18) | 1.8(18)  |
| C2aa | 17(3)    | 20(3)     | 13(3)     | 6(2)     | 1(2)     | 4(2)     |
| C10  | 15(3)    | 18(3)     | 20(3)     | 0(2)     | -3(2)    | 3(2)     |
| C11  | 12(3)    | 10(2)     | 14(3)     | -1(2)    | 1(2)     | -1(2)    |
| C22  | 21(3)    | 13(3)     | 21(3)     | -1(2)    | 0(2)     | 6(2)     |
| C1aa | 14(3)    | 15(3)     | 18(3)     | 3(2)     | 1(2)     | -3(2)    |
| C15  | 15(3)    | 19(3)     | 14(3)     | -4(2)    | 3(2)     | 0(2)     |
| C17  | 18(3)    | 20(3)     | 23(3)     | 1(2)     | -2(2)    | 6(3)     |
| C19  | 21(3)    | 27(3)     | 15(3)     | -4(3)    | -5(2)    | 5(3)     |
| C20  | 15(3)    | 21(3)     | 21(3)     | 0(2)     | 5(2)     | 4(2)     |
| C24  | 18(3)    | 13(3)     | 16(3)     | -1(2)    | 5(2)     | 3(2)     |
| C25  | 22(3)    | 24(3)     | 18(3)     | 0(3)     | 3(2)     | 2(3)     |
| C27  | 14(3)    | 17(3)     | 26(3)     | 4(2)     | 0(2)     | 5(2)     |
| C30  | 20(3)    | 16(3)     | 20(3)     | -3(2)    | 3(2)     | 6(2)     |
| C33  | 16(3)    | 25(3)     | 22(3)     | -5(2)    | 7(2)     | -2(3)    |
| C3aa | 20(3)    | 18(3)     | 12(3)     | 5(2)     | -3(2)    | 0(2)     |
| C14  | 19(3)    | 17(3)     | 22(3)     | 5(2)     | 2(2)     | -2(2)    |
| O9   | 42(3)    | 20(2)     | 24(2)     | 1(2)     | -1(2)    | -2.3(19) |
| O10  | 49(3)    | 31(3)     | 26(3)     | 0(2)     | 14(2)    | -8(2)    |
| C12  | 27(3)    | 24(3)     | 16(3)     | 6(3)     | -6(2)    | -3(2)    |
| C13  | 67(7)    | 49(6)     | 38(5)     | -15(5)   | 24(5)    | -31(4)   |
| C9   | 13(3)    | 24(3)     | 29(4)     | 2(3)     | 6(3)     | -1(3)    |
| P1   | 13.8(7)  | 14.4(7)   | 14.7(7)   | -0.7(5)  | 5.1(5)   | -0.6(5)  |
| F0aa | 24.5(18) | 24.4(19)  | 20.7(17)  | -2.2(15) | 13.3(15) | -1.7(14) |
| F8   | 25(2)    | 48(3)     | 21.0(19)  | -2.3(19) | -3.1(16) | 1.2(18)  |
| F1aa | 18.3(17) | 14.2(16)  | 33(2)     | -0.4(14) | 9.5(15)  | -2.6(14) |
| F3   | 24(2)    | 39(2)     | 21.1(19)  | 11.9(17) | -2.4(15) | 2.7(16)  |
| F4   | 43(2)    | 15.2(18)  | 45(2)     | -6.3(18) | 27(2)    | -8.4(17) |
| F1   | 26.7(19) | 26.0(19)  | 24.0(19)  | -4.9(16) | 16.9(16) | -5.0(15) |

Table 4 Bond Lengths for 6.

| Atom | Atom | Length/ $\text{\AA}$ | Atom | Atom | Length/ $\text{\AA}$ |
|------|------|----------------------|------|------|----------------------|
| Pt1  | N0aa | 2.166(5)             | C15  | C19  | 1.350(9)             |
| Pt1  | C0aa | 2.046(6)             | C17  | C19  | 1.414(9)             |
| Pt1  | N13  | 2.182(5)             | C20  | C33  | 1.385(8)             |
| Pt1  | N1aa | 2.162(5)             | C25  | C30  | 1.389(9)             |

|      |      |          |      |      |          |
|------|------|----------|------|------|----------|
| Pt1  | C2aa | 2.038(5) | C25  | C3aa | 1.388(9) |
| Pt1  | C14  | 2.046(6) | C27  | C9   | 1.409(9) |
| N0aa | C1aa | 1.356(8) | C33  | C9   | 1.380(9) |
| N0aa | C20  | 1.327(8) | C3aa | C12  | 1.490(8) |
| N13  | C24  | 1.358(8) | O9   | C12  | 1.197(8) |
| N13  | C30  | 1.340(8) | O10  | C12  | 1.325(8) |
| N1aa | C11  | 1.347(7) | O10  | C13  | 1.485(9) |
| N1aa | C15  | 1.330(7) | P1   | F0aa | 1.600(4) |
| C10  | C11  | 1.401(8) | P1   | F8   | 1.599(4) |
| C10  | C17  | 1.383(9) | P1   | F1aa | 1.605(4) |
| C11  | C1aa | 1.482(8) | P1   | F3   | 1.605(4) |
| C22  | C24  | 1.392(8) | P1   | F4   | 1.605(4) |
| C22  | C3aa | 1.392(9) | P1   | F1   | 1.607(4) |
| C1aa | C27  | 1.371(8) |      |      |          |

Table 5 Bond Angles for 6.

| Atom | Atom | Atom | Angle/°   | Atom | Atom | Atom | Angle/°   |
|------|------|------|-----------|------|------|------|-----------|
| C0aa | Pt1  | N0aa | 176.0(2)  | C19  | C15  | N1aa | 123.8(6)  |
| N13  | Pt1  | N0aa | 87.26(18) | C19  | C17  | C10  | 118.7(6)  |
| N13  | Pt1  | C0aa | 92.3(2)   | C17  | C19  | C15  | 118.1(6)  |
| N1aa | Pt1  | N0aa | 76.33(18) | C33  | C20  | N0aa | 123.2(6)  |
| N1aa | Pt1  | C0aa | 99.7(2)   | C22  | C24  | N13  | 122.1(5)  |
| N1aa | Pt1  | N13  | 87.73(17) | C3aa | C25  | C30  | 118.7(6)  |
| C2aa | Pt1  | N0aa | 99.1(2)   | C9   | C27  | C1aa | 118.8(6)  |
| C2aa | Pt1  | C0aa | 84.8(2)   | C25  | C30  | N13  | 123.4(6)  |
| C2aa | Pt1  | N13  | 92.2(2)   | C9   | C33  | C20  | 118.1(6)  |
| C2aa | Pt1  | N1aa | 175.4(2)  | C25  | C3aa | C22  | 118.6(6)  |
| C14  | Pt1  | N0aa | 92.5(2)   | C12  | C3aa | C22  | 118.2(6)  |
| C14  | Pt1  | C0aa | 88.0(3)   | C12  | C3aa | C25  | 123.1(6)  |
| C14  | Pt1  | N13  | 179.3(2)  | C13  | O10  | C12  | 117.1(6)  |
| C14  | Pt1  | N1aa | 92.8(2)   | O9   | C12  | C3aa | 123.8(6)  |
| C14  | Pt1  | C2aa | 87.2(2)   | O10  | C12  | C3aa | 111.1(6)  |
| C1aa | N0aa | Pt1  | 115.8(4)  | O10  | C12  | O9   | 125.1(6)  |
| C20  | N0aa | Pt1  | 125.2(4)  | C33  | C9   | C27  | 119.2(6)  |
| C20  | N0aa | C1aa | 118.9(5)  | F8   | P1   | F0aa | 90.1(2)   |
| C24  | N13  | Pt1  | 121.8(4)  | F1aa | P1   | F0aa | 90.05(19) |
| C30  | N13  | Pt1  | 120.1(4)  | F1aa | P1   | F8   | 89.8(2)   |
| C30  | N13  | C24  | 117.8(5)  | F3   | P1   | F0aa | 90.3(2)   |
| C11  | N1aa | Pt1  | 115.0(4)  | F3   | P1   | F8   | 179.6(2)  |
| C15  | N1aa | Pt1  | 125.3(4)  | F3   | P1   | F1aa | 90.2(2)   |
| C15  | N1aa | C11  | 119.5(5)  | F4   | P1   | F0aa | 90.2(2)   |
| C17  | C10  | C11  | 119.1(6)  | F4   | P1   | F8   | 89.7(3)   |

|      |      |      |          |    |    |      |          |
|------|------|------|----------|----|----|------|----------|
| C10  | C11  | N1aa | 120.5(5) | F4 | P1 | F1aa | 179.4(2) |
| C1aa | C11  | N1aa | 117.2(5) | F4 | P1 | F3   | 90.3(2)  |
| C1aa | C11  | C10  | 122.3(5) | F1 | P1 | F0aa | 179.6(2) |
| C3aa | C22  | C24  | 119.3(5) | F1 | P1 | F8   | 89.5(2)  |
| C11  | C1aa | N0aa | 115.1(5) | F1 | P1 | F1aa | 90.0(2)  |
| C27  | C1aa | N0aa | 121.8(6) | F1 | P1 | F3   | 90.0(2)  |
| C27  | C1aa | C11  | 123.1(5) | F1 | P1 | F4   | 89.8(2)  |

Table 6 Hydrogen Atom Coordinates ( $\text{\AA}\times 10^4$ ) and Isotropic Displacement Parameters ( $\text{\AA}^2\times 10^3$ ) for 6.

| Atom | x        | y         | z        | U(eq)    |
|------|----------|-----------|----------|----------|
| H20  | 1951(6)  | 5639(4)   | 3678(4)  | 22.4(15) |
| H33  | -154(6)  | 5561(5)   | 3662(4)  | 25.3(15) |
| H9   | -1388(6) | 6451(5)   | 2665(4)  | 26.0(16) |
| H27  | -448(6)  | 7403(4)   | 1713(4)  | 22.7(14) |
| H24  | 4722(5)  | 8775(4)   | 2845(4)  | 18.5(14) |
| H30  | 3034(6)  | 7262(4)   | 4416(4)  | 22.5(14) |
| H22  | 4394(6)  | 10109(4)  | 3609(4)  | 21.8(14) |
| H15  | 4688(5)  | 7869(4)   | 1185(4)  | 19.5(14) |
| H19  | 3839(6)  | 8888(5)   | 186(4)   | 25.9(15) |
| H17  | 1691(6)  | 9147(5)   | 62(4)    | 25.0(15) |
| H10  | 533(6)   | 8353(4)   | 978(4)   | 21.8(15) |
| H0aa | 5954(9)  | 6780(30)  | 2066(7)  | 31.0(19) |
| H0ab | 6033(11) | 7472(12)  | 2840(30) | 31.0(19) |
| H0ac | 6265(6)  | 6410(20)  | 3000(20) | 31.0(19) |
| H14a | 3262(16) | 5190(19)  | 1940(30) | 29.6(19) |
| H14b | 4210(40) | 5693(5)   | 1420(10) | 29.6(19) |
| H14c | 4680(30) | 5101(16)  | 2231(16) | 29.6(19) |
| H2aa | 4810(40) | 6218(4)   | 4239(8)  | 25.0(17) |
| H2ab | 3884(13) | 5440(20)  | 3877(18) | 25.0(17) |
| H2ac | 5220(30) | 5460(20)  | 3616(11) | 25.0(17) |
| H13a | 1970(70) | 11510(20) | 5664(10) | 75(4)    |
| H13b | 1460(40) | 10848(17) | 6330(40) | 75(4)    |
| H13c | 2820(30) | 11210(30) | 6490(30) | 75(4)    |

## Experimental

Single crystals of  $\text{C}_{21}\text{H}_{26}\text{N}_3\text{O}_2\text{F}_6\text{PPt}$  [6] were grown from MeCN/water. A suitable crystal was selected and mounted on a SuperNova, Dual, Cu at zero, AtlasS2 diffractometer. The crystal was kept at 289.33(10) K during data collection. Using Olex2 [1], the structure was solved with the olex2.solve [2] structure solution program using Charge Flipping and refined with the olex2.refine [3] refinement package using Gauss-Newton minimisation.

1. Dolomanov, O.V., Bourhis, L.J., Gildea, R.J, Howard, J.A.K. & Puschmann, H. (2009), J. Appl. Cryst. 42, 339-341.

2. Bourhis, L.J., Dolomanov, O.V., Gildea, R.J., Howard, J.A.K., Puschmann, H. (2015). Acta Cryst. A71, 59-75.
3. Bourhis, L.J., Dolomanov, O.V., Gildea, R.J., Howard, J.A.K., Puschmann, H. (2015). Acta Cryst. A71, 59-75.

Crystal structure determination of [6]

**Crystal Data** for  $C_{21}H_{26}N_3O_2F_6Pt$  ( $M = 677.47$  g/mol): monoclinic, space group  $P2_1/n$  (no. 14),  $a = 10.94969(19)$  Å,  $b = 14.3600(2)$  Å,  $c = 15.7460(3)$  Å,  $\beta = 96.7748(17)^\circ$ ,  $V = 2458.57(8)$  Å<sup>3</sup>,  $Z = 4$ ,  $T = 289.33(10)$  K,  $\mu(Cu\ K\alpha) = 11.910$  mm<sup>-1</sup>,  $D_{calc} = 1.8301$  g/cm<sup>3</sup>, 8172 reflections measured ( $8.36^\circ \leq 2\theta \leq 148.4^\circ$ ), 4766 unique ( $R_{int} = 0.0252$ ,  $R_{\sigma} = 0.0371$ ) which were used in all calculations. The final  $R_1$  was 0.0366 ( $I \geq 2u(I)$ ) and  $wR_2$  was 0.1323 (all data).

Refinement model description

Number of restraints - 0, number of constraints - 38.

Details:

1. Fixed Uiso

At 1.2 times of:

All C(H) groups

At 1.5 times of:

All C(H,H,H) groups

2.a Aromatic/amide H refined with riding coordinates:

C20(H20), C33(H33), C9(H9), C27(H27), C24(H24), C30(H30), C22(H22), C15(H15),

C19(H19), C17(H17), C10(H10)

2.b Idealised Me refined as rotating group:

C0aa(H0aa,H0ab,H0ac), C14(H14a,H14b,H14c), C2aa(H2aa,H2ab,H2ac), C13(H13a,

H13b,H13c)

O1(H1)

Crystal data for **9**.

Table 1 Crystal data and structure refinement for 9.

|                        |                         |
|------------------------|-------------------------|
| Identification code    | 9                       |
| Empirical formula      | $C_{20}H_{27}N_2O_2PtS$ |
| Formula weight         | 563.58                  |
| Temperature/K          | 100                     |
| Crystal system         | monoclinic              |
| Space group            | $P2_1/c$                |
| $a/\text{\AA}$         | 14.3479(5)              |
| $b/\text{\AA}$         | 9.0481(3)               |
| $c/\text{\AA}$         | 16.1964(11)             |
| $\alpha/^\circ$        | 90                      |
| $\beta/^\circ$         | 109.574(8)              |
| $\gamma/^\circ$        | 90                      |
| Volume/ $\text{\AA}^3$ | 1981.12(19)             |
| Z                      | 4                       |



|                                                |                                                               |
|------------------------------------------------|---------------------------------------------------------------|
| $\rho_{\text{calc}}/\text{cm}^3$               | 1.8894                                                        |
| $\mu/\text{mm}^{-1}$                           | 7.205                                                         |
| F(000)                                         | 1090.6                                                        |
| Crystal size/ $\text{mm}^3$                    | $0.2 \times 0.2 \times 0.2$                                   |
| Radiation                                      | Mo K $\alpha$ ( $\lambda = 0.71075$ )                         |
| 2 $\Theta$ range for data collection/ $^\circ$ | 6.02 to 54.98                                                 |
| Index ranges                                   | $-18 \leq h \leq 18, -11 \leq k \leq 11, -21 \leq l \leq 18$  |
| Reflections collected                          | 15341                                                         |
| Independent reflections                        | 4503 [ $R_{\text{int}} = 0.0245, R_{\text{sigma}} = 0.0243$ ] |
| Data/restraints/parameters                     | 4503/0/247                                                    |
| Goodness-of-fit on $F^2$                       | 0.648                                                         |
| Final R indexes [ $I \geq 2\sigma(I)$ ]        | $R_1 = 0.0184, wR_2 = 0.0699$                                 |
| Final R indexes [all data]                     | $R_1 = 0.0205, wR_2 = 0.0736$                                 |
| Largest diff. peak/hole / $e \text{ \AA}^{-3}$ | 0.76/-0.97                                                    |

Table 2 Fractional Atomic Coordinates ( $\times 10^4$ ) and Equivalent Isotropic Displacement Parameters ( $\text{\AA}^2 \times 10^3$ ) for 9.  $U_{\text{eq}}$  is defined as 1/3 of the trace of the orthogonalised  $U_{\text{ij}}$  tensor.

| Atom | x          | y          | z          | U(eq)     |
|------|------------|------------|------------|-----------|
| Pt1  | 8036.15(7) | 974.57(11) | 6802.40(6) | 10.15(7)  |
| S1   | 8196.7(5)  | 3616.7(9)  | 7183.5(4)  | 12.98(14) |
| N4   | 7028.9(16) | 1343(3)    | 5510.9(15) | 10.8(4)   |
| N5   | 9003.4(18) | 1299(3)    | 6064.0(16) | 11.8(5)   |
| C13  | 6971(2)    | 669(4)     | 7376(2)    | 16.1(6)   |
| C16  | 9122(2)    | 531(4)     | 7966.3(18) | 17.1(6)   |
| C6   | 9995(2)    | 1373(3)    | 6390(2)    | 14.9(5)   |
| C7   | 10570(2)   | 1685(3)    | 5881.2(19) | 18.0(6)   |
| C10  | 8545.0(19) | 1543(3)    | 5197.0(17) | 12.2(5)   |
| C14  | 9081(2)    | 1844(3)    | 4648.5(19) | 15.9(6)   |
| C1   | 10105(2)   | 1930(4)    | 4990(2)    | 18.7(6)   |
| C2   | 5435(2)    | 1575(4)    | 4418.7(19) | 17.0(6)   |
| C9   | 6039.6(19) | 1391(3)    | 5277.3(18) | 13.0(5)   |
| C12  | 5861(2)    | 1719(3)    | 3775.0(19) | 18.8(6)   |
| C3   | 7461.8(19) | 1500(3)    | 4891.6(16) | 11.3(5)   |
| C4   | 6886(2)    | 1675(3)    | 4006.7(18) | 16.2(6)   |
| C5   | 7635(2)    | 4561(3)    | 6179.8(17) | 12.2(5)   |
| C8   | 8207.8(19) | 5031(3)    | 5676.6(17) | 12.3(5)   |
| C11  | 6622.6(19) | 4864(3)    | 5879.3(17) | 12.9(5)   |
| C15  | 6190(2)    | 5635(3)    | 5101.4(19) | 12.6(5)   |
| C17  | 6769(2)    | 6121(3)    | 4614(2)    | 11.9(6)   |
| C18  | 7783(2)    | 5796(3)    | 4898(2)    | 14.1(6)   |
| O1   | 6907.4(14) | 7707(2)    | 3514.5(12) | 16.1(4)   |

|     |            |          |            |         |
|-----|------------|----------|------------|---------|
| C19 | 6269(2)    | 6968(3)  | 3799.2(19) | 14.8(6) |
| C1a | 7997(2)    | -1281(4) | 6579(2)    | 17.1(6) |
| O2  | 5386.3(16) | 6994(3)  | 3431.3(14) | 23.7(5) |
| C1b | 6488(2)    | 8522(4)  | 2704.1(18) | 17.8(6) |

Table 3 Anisotropic Displacement Parameters ( $\text{\AA}^2 \times 10^3$ ) for 9. The Anisotropic displacement factor exponent takes the form:  $-2\pi^2[h^2a^{*2}U_{11}+2hka^*b^*U_{12}+\dots]$ .

| Atom | $U_{11}$ | $U_{22}$ | $U_{33}$ | $U_{12}$ | $U_{13}$ | $U_{23}$ |
|------|----------|----------|----------|----------|----------|----------|
| Pt1  | 11.43(9) | 10.54(9) | 8.56(9)  | -0.15(3) | 3.45(6)  | 0.14(3)  |
| S1   | 15.8(3)  | 12.5(3)  | 9.0(3)   | -0.1(3)  | 1.9(2)   | -0.8(3)  |
| N4   | 9.4(10)  | 10.6(10) | 10.3(10) | -1.8(9)  | 0.6(8)   | -1.4(9)  |
| N5   | 15.8(11) | 12.1(10) | 9.6(11)  | -0.2(10) | 6.8(9)   | -0.8(10) |
| C13  | 17.3(14) | 19.7(14) | 15.6(14) | -3.3(12) | 11.3(11) | 1.9(12)  |
| C16  | 17.4(13) | 21.2(15) | 11.0(13) | 3.6(12)  | 2.4(10)  | 3.6(12)  |
| C6   | 10.4(12) | 14.8(13) | 17.2(13) | 1.9(11)  | 1.7(10)  | 0.6(12)  |
| C7   | 12.4(12) | 19.0(15) | 22.7(15) | -1.3(11) | 6.2(11)  | 0.1(12)  |
| C10  | 16.5(12) | 9.2(12)  | 11.5(12) | -1.8(10) | 5.5(10)  | -2.0(11) |
| C14  | 18.5(13) | 17.5(14) | 12.5(13) | -0.2(11) | 6.2(10)  | 0.2(11)  |
| C1   | 15.6(13) | 24.6(16) | 19.2(13) | -2.0(11) | 10.3(11) | 0.7(12)  |
| C2   | 11.6(12) | 19.9(15) | 15.9(13) | -1.3(11) | -0.2(10) | -3.4(12) |
| C9   | 11.3(12) | 13.0(13) | 14.4(13) | -2.0(11) | 3.7(10)  | -3.7(11) |
| C12  | 17.4(13) | 19.1(14) | 16.4(13) | 0.2(12)  | 0.9(10)  | 1.8(12)  |
| C3   | 17.4(13) | 8.0(12)  | 9.2(11)  | 0.6(11)  | 5.2(10)  | -0.9(10) |
| C4   | 18.2(13) | 16.8(14) | 11.6(12) | 0.1(11)  | 2.1(10)  | 0.8(11)  |
| C5   | 15.3(12) | 5.2(12)  | 14.7(12) | -1.6(10) | 3.1(10)  | -0.8(11) |
| C8   | 12.5(11) | 12.3(13) | 12.6(11) | 0.4(10)  | 4.9(9)   | -0.7(10) |
| C11  | 14.6(12) | 13.2(13) | 12.4(12) | -0.2(10) | 6.5(9)   | 1.1(10)  |
| C15  | 10.6(12) | 12.0(12) | 15.5(13) | -0.6(11) | 4.8(10)  | -4.0(12) |
| C17  | 11.5(13) | 11.1(13) | 12.8(14) | -0.1(9)  | 3.7(11)  | -1.4(10) |
| C18  | 13.9(13) | 13.8(13) | 15.5(14) | -0.4(10) | 6.2(11)  | -0.6(11) |
| O1   | 17.6(9)  | 17(1)    | 12.7(9)  | -2.6(8)  | 4.0(7)   | 5.1(8)   |
| C19  | 16.0(13) | 14.7(14) | 13.7(13) | -0.1(11) | 4.9(10)  | 1.5(11)  |
| C1a  | 23.5(16) | 8.9(13)  | 20.2(14) | -1.1(11) | 9.2(11)  | -1.9(13) |
| O2   | 13.4(10) | 34.9(14) | 20.2(10) | -1.6(9)  | 2.3(8)   | 9.8(10)  |
| C1b  | 18.9(13) | 20.8(15) | 13.4(13) | -2.6(12) | 5.2(11)  | 6.7(12)  |

Table 4 Bond Lengths for 9.

| Atom | Atom | Length/ $\text{\AA}$ | Atom | Atom | Length/ $\text{\AA}$ |
|------|------|----------------------|------|------|----------------------|
| Pt1  | S1   | 2.4604(8)            | C14  | C1   | 1.388(4)             |
| Pt1  | N4   | 2.133(2)             | C2   | C9   | 1.380(4)             |
| Pt1  | N5   | 2.134(2)             | C2   | C12  | 1.380(4)             |

|     |     |          |     |     |          |
|-----|-----|----------|-----|-----|----------|
| Pt1 | C13 | 2.055(3) | C12 | C4  | 1.391(4) |
| Pt1 | C16 | 2.043(3) | C3  | C4  | 1.403(3) |
| Pt1 | C1a | 2.070(3) | C5  | C8  | 1.403(4) |
| S1  | C5  | 1.773(3) | C5  | C11 | 1.396(4) |
| N4  | C9  | 1.342(3) | C8  | C18 | 1.388(4) |
| N4  | C3  | 1.353(4) | C11 | C15 | 1.391(4) |
| N5  | C6  | 1.343(4) | C15 | C17 | 1.394(4) |
| N5  | C10 | 1.354(3) | C17 | C18 | 1.402(4) |
| C6  | C7  | 1.377(4) | C17 | C19 | 1.487(4) |
| C7  | C1  | 1.390(4) | O1  | C19 | 1.334(3) |
| C10 | C14 | 1.382(4) | O1  | C1b | 1.449(3) |
| C10 | C3  | 1.465(4) | C19 | O2  | 1.206(4) |

Table 5 Bond Angles for 9.

| Atom | Atom | Atom | Angle/°    | Atom | Atom | Atom | Angle/°  |
|------|------|------|------------|------|------|------|----------|
| N4   | Pt1  | S1   | 94.00(7)   | C3   | C10  | N5   | 115.9(2) |
| N5   | Pt1  | S1   | 89.02(7)   | C3   | C10  | C14  | 122.9(2) |
| N5   | Pt1  | N4   | 77.47(9)   | C1   | C14  | C10  | 119.8(3) |
| C13  | Pt1  | S1   | 92.23(9)   | C14  | C1   | C7   | 118.8(3) |
| C13  | Pt1  | N4   | 95.87(11)  | C12  | C2   | C9   | 119.0(3) |
| C13  | Pt1  | N5   | 173.29(10) | C2   | C9   | N4   | 122.4(3) |
| C16  | Pt1  | S1   | 88.91(10)  | C4   | C12  | C2   | 119.3(3) |
| C16  | Pt1  | N4   | 172.86(10) | C10  | C3   | N4   | 116.8(2) |
| C16  | Pt1  | N5   | 96.09(11)  | C4   | C3   | N4   | 120.7(2) |
| C16  | Pt1  | C13  | 90.52(12)  | C4   | C3   | C10  | 122.5(2) |
| C1a  | Pt1  | S1   | 175.20(10) | C3   | C4   | C12  | 119.1(3) |
| C1a  | Pt1  | N4   | 90.74(12)  | C8   | C5   | S1   | 120.3(2) |
| C1a  | Pt1  | N5   | 91.30(11)  | C11  | C5   | S1   | 121.0(2) |
| C1a  | Pt1  | C13  | 88.01(13)  | C11  | C5   | C8   | 118.8(2) |
| C1a  | Pt1  | C16  | 86.30(13)  | C18  | C8   | C5   | 121.0(3) |
| C5   | S1   | Pt1  | 105.22(9)  | C15  | C11  | C5   | 120.7(2) |
| C9   | N4   | Pt1  | 125.93(19) | C17  | C15  | C11  | 120.1(3) |
| C3   | N4   | Pt1  | 114.52(17) | C18  | C17  | C15  | 119.8(3) |
| C3   | N4   | C9   | 119.5(2)   | C19  | C17  | C15  | 117.6(3) |
| C6   | N5   | Pt1  | 126.0(2)   | C19  | C17  | C18  | 122.5(3) |
| C10  | N5   | Pt1  | 114.98(18) | C17  | C18  | C8   | 119.6(3) |
| C10  | N5   | C6   | 118.8(2)   | C1b  | O1   | C19  | 116.3(2) |
| C7   | C6   | N5   | 122.9(3)   | O1   | C19  | C17  | 112.5(2) |
| C1   | C7   | C6   | 118.6(3)   | O2   | C19  | C17  | 124.2(3) |
| C14  | C10  | N5   | 121.1(2)   | O2   | C19  | O1   | 123.2(3) |

Table 6 Hydrogen Atom Coordinates ( $\text{\AA}\times 10^4$ ) and Isotropic Displacement Parameters ( $\text{\AA}^2\times 10^3$ ) for 9.

| Atom | x          | y        | z          | U(eq)   |
|------|------------|----------|------------|---------|
| H11  | 6233.1(19) | 4547(3)  | 6202.5(17) | 15.5(6) |
| H15  | 5514(2)    | 5826(3)  | 4905.9(19) | 15.1(6) |
| H18  | 8168(2)    | 6092(3)  | 4567(2)    | 16.9(7) |
| H8   | 8881.9(19) | 4826(3)  | 5867.6(17) | 14.8(6) |
| H9   | 5750.3(19) | 1297(3)  | 5709.7(18) | 15.7(6) |
| H2   | 4752(2)    | 1601(4)  | 4276.2(19) | 20.4(7) |
| H12  | 5467(2)    | 1844(3)  | 3192.5(19) | 22.6(7) |
| H4   | 7186(2)    | 1761(3)  | 3580.8(18) | 19.5(7) |
| H6   | 10307(2)   | 1206(3)  | 6986(2)    | 17.8(6) |
| H14  | 8756(2)    | 1988(3)  | 4052.5(19) | 19.1(7) |
| H1   | 10473(2)   | 2147(4)  | 4629(2)    | 22.4(7) |
| H7   | 11256(2)   | 1731(3)  | 6128.3(19) | 21.5(7) |
| H1ba | 6321(15)   | 7848(5)  | 2218(2)    | 26.6(9) |
| H1bb | 5902(9)    | 9030(20) | 2710(6)    | 26.6(9) |
| H1bc | 6962(6)    | 9228(17) | 2647(7)    | 26.6(9) |
| H13a | 6562(10)   | -157(15) | 7106(9)    | 24.1(9) |
| H13b | 7283(2)    | 480(20)  | 7990(3)    | 24.1(9) |
| H13c | 6571(10)   | 1542(9)  | 7299(12)   | 24.1(9) |
| H16a | 9497(10)   | 1413(7)  | 8182(7)    | 25.7(8) |
| H16b | 8827(2)    | 190(20)  | 8384(4)    | 25.7(8) |
| H16c | 9552(9)    | -221(17) | 7880(3)    | 25.7(8) |
| H1aa | 8566(9)    | -1566(5) | 6432(14)   | 25.6(9) |
| H1ab | 7999(16)   | -1795(4) | 7098(5)    | 25.6(9) |
| H1ac | 7407(8)    | -1526(5) | 6104(10)   | 25.6(9) |

## Experimental

Single crystals of  $\text{C}_{20}\text{H}_{27}\text{N}_2\text{O}_2\text{PtS}$  [9] were grown from toluene. A suitable crystal was selected and mounted on a diffractometer. The crystal was kept at 100 K during data collection. Using Olex2 [1], the structure was solved with the olex2.solve [2] structure solution program using Charge Flipping and refined with the olex2.refine [3] refinement package using Gauss-Newton minimisation.

1. Dolomanov, O.V., Bourhis, L.J., Gildea, R.J., Howard, J.A.K. & Puschmann, H. (2009), *J. Appl. Cryst.* 42, 339-341.
2. Bourhis, L.J., Dolomanov, O.V., Gildea, R.J., Howard, J.A.K., Puschmann, H. (2013). in preparation.
3. Bourhis, L.J., Dolomanov, O.V., Gildea, R.J., Howard, J.A.K., Puschmann, H. (2013). in preparation.

## Crystal structure determination of [9]

**Crystal Data** for  $\text{C}_{20}\text{H}_{27}\text{N}_2\text{O}_2\text{PtS}$  ( $M = 563.58$  g/mol): monoclinic, space group  $\text{P2}_1/\text{c}$  (no. 14),  $a = 14.3479(5)$   $\text{\AA}$ ,  $b = 9.0481(3)$   $\text{\AA}$ ,  $c = 16.1964(11)$   $\text{\AA}$ ,  $\beta = 109.574(8)^\circ$ ,  $V = 1981.12(19)$   $\text{\AA}^3$ ,  $Z = 4$ ,  $T = 100$  K,  $\mu(\text{Mo K}\alpha) = 7.205$   $\text{mm}^{-1}$ ,  $D_{\text{calc}} = 1.8894$   $\text{g/cm}^3$ , 15341 reflections measured ( $6.02^\circ \leq 2\theta \leq 54.98^\circ$ ), 4503 unique ( $R_{\text{int}} = 0.0245$ ,  $R_{\text{sigma}} = 0.0243$ ) which were used in all calculations. The final  $R_1$  was 0.0184 ( $I \geq 2u(I)$ ) and  $wR_2$  was 0.0736 (all data).

## Refinement model description

Number of restraints - 0, number of constraints - 40.

### Details:

#### 1. Fixed Uiso

At 1.2 times of:

All C(H) groups

At 1.5 times of:

All C(H,H,H) groups

#### 2.a Aromatic/amide H refined with riding coordinates:

C11(H11), C15(H15), C18(H18), C8(H8), C9(H9), C2(H2), C12(H12), C4(H4),

C6(H6), C14(H14), C1(H1), C7(H7)

#### 2.b Idealised Me refined as rotating group:

C1b(H1ba,H1bb,H1bc), C13(H13a,H13b,H13c), C16(H16a,H16b,H16c), C1a(H1aa,H1ab,

## Crystal data for **10**

Table 1 Crystal data and structure refinement for 10.

|                                    |                                                                   |
|------------------------------------|-------------------------------------------------------------------|
| Identification code                | 10                                                                |
| Empirical formula                  | C <sub>25</sub> H <sub>27</sub> N <sub>2</sub> O <sub>6</sub> PtS |
| Formula weight                     | 678.65                                                            |
| Temperature/K                      | 100                                                               |
| Crystal system                     | triclinic                                                         |
| Space group                        | P-1                                                               |
| a/Å                                | 7.2201(5)                                                         |
| b/Å                                | 13.2276(9)                                                        |
| c/Å                                | 14.0336(10)                                                       |
| α/°                                | 70.675(5)                                                         |
| β/°                                | 80.551(6)                                                         |
| γ/°                                | 84.130(6)                                                         |
| Volume/Å <sup>3</sup>              | 1245.94(16)                                                       |
| Z                                  | 2                                                                 |
| ρ <sub>calc</sub> /cm <sup>3</sup> | 1.8088                                                            |
| μ/mm <sup>-1</sup>                 | 5.756                                                             |
| F(000)                             | 663.4                                                             |
| Crystal size/mm <sup>3</sup>       | 0.2 x 0.2 x 0.2                                                   |
| Radiation                          | Mo Kα (λ = 0.71075)                                               |
| 2θ range for data collection/°     | 5.18 to 55.02                                                     |
| Index ranges                       | -9 ≤ h ≤ 9, -17 ≤ k ≤ 14, -18 ≤ l ≤ 18                            |
| Reflections collected              | 21239                                                             |
| Independent reflections            | 5677 [R <sub>int</sub> = 0.2641, R <sub>sigma</sub> = 0.1575]     |
| Data/restraints/parameters         | 5677/0/321                                                        |
| Goodness-of-fit on F <sup>2</sup>  | 1.121                                                             |
| Final R indexes [I ≥ 2σ (I)]       | R <sub>1</sub> = 0.0804, wR <sub>2</sub> = 0.1866                 |

Final R indexes [all data]  $R_1 = 0.0928$ ,  $wR_2 = 0.2041$

Largest diff. peak/hole /  $e \text{ \AA}^{-3}$  7.68/-4.66

Table 2 Fractional Atomic Coordinates ( $\times 10^4$ ) and Equivalent Isotropic Displacement Parameters ( $\text{\AA}^2 \times 10^3$ ) for 10.  $U_{\text{eq}}$  is defined as 1/3 of the trace of the orthogonalised  $U_{ij}$  tensor.

| Atom | x         | y         | z          | U(eq)     |
|------|-----------|-----------|------------|-----------|
| Pt1  | 3401.8(4) | 3839.0(3) | 7504.4(2)  | 24.32(17) |
| S2   | 6547(4)   | 3435(2)   | 6657.0(19) | 29.0(5)   |
| N6   | 2768(11)  | 2185(8)   | 8220(6)    | 23.6(17)  |
| N9   | 2192(11)  | 3460(8)   | 6352(6)    | 25.6(19)  |
| C8   | 1583(13)  | 665(8)    | 7993(7)    | 24.3(19)  |
| C9   | 1707(12)  | 2460(8)   | 6608(6)    | 21.3(18)  |
| C10  | 1649(13)  | -1171(8)  | 9368(7)    | 25.0(19)  |
| C11  | 2048(14)  | 4140(8)   | 5413(7)    | 27(2)     |
| C15  | 1973(12)  | 1725(8)   | 7651(7)    | 22.8(18)  |
| C19  | 998(12)   | 2073(8)   | 5936(7)    | 22.0(19)  |
| C20  | 1969(14)  | 3(9)      | 8964(7)    | 28(2)     |
| C1   | 1419(13)  | 3818(9)   | 4683(7)    | 27(2)     |
| C2   | 873(13)   | 2772(8)   | 4950(7)    | 25.1(19)  |
| C3   | 5863(13)  | 1802(9)   | 5959(7)    | 29(2)     |
| C14  | 2761(12)  | 480(8)    | 9555(7)    | 22.4(18)  |
| C16  | 3133(13)  | 1561(9)   | 9148(7)    | 28(2)     |
| O2   | 169(11)   | 2961(6)   | 3285(5)    | 32.0(16)  |
| O3   | 928(11)   | -1503(6)  | 8715(5)    | 29.1(16)  |
| O4   | 1974(13)  | -1726(7)  | 10203(6)   | 40.5(19)  |
| O5   | -307(9)   | 1392(6)   | 4541(5)    | 26.5(14)  |
| O6   | 5701(10)  | -1544(7)  | 6329(5)    | 33.2(17)  |
| O7   | 5971(11)  | -1891(6)  | 7987(5)    | 35.0(17)  |
| C4   | 5721(13)  | 734(9)    | 6044(7)    | 26(2)     |
| C5   | 201(13)   | 2411(8)   | 4161(7)    | 23.3(18)  |
| C6   | 5921(13)  | -1228(8)  | 7028(8)    | 27(2)     |
| C7   | 6176(13)  | -92(8)    | 6928(7)    | 25(2)     |
| C13  | 4504(17)  | 4043(11)  | 8691(8)    | 38(3)     |
| C12  | 6433(13)  | 2081(8)   | 6737(7)    | 23.0(18)  |
| C17  | 6797(12)  | 182(8)    | 7692(7)    | 24.1(19)  |
| C18  | 512(18)   | -2609(10) | 9063(8)    | 39(3)     |
| C1a  | 5705(17)  | -2996(9)  | 8144(8)    | 36(2)     |
| C1b  | 3898(16)  | 5414(10)  | 6758(9)    | 36(3)     |
| C1c  | -1089(14) | 1019(9)   | 3843(8)    | 33(2)     |
| C1d  | 6936(13)  | 1246(8)   | 7604(7)    | 24.6(19)  |
| C1e  | 761(16)   | 4296(10)  | 8103(10)   | 39(3)     |

Table 3 Anisotropic Displacement Parameters ( $\text{\AA}^2 \times 10^3$ ) for 10. The Anisotropic displacement factor exponent takes the form:  $-2\pi^2[h^2a^2U_{11}+2hka*b*U_{12}+\dots]$ .

| Atom | $U_{11}$ | $U_{22}$ | $U_{33}$ | $U_{12}$  | $U_{13}$  | $U_{23}$  |
|------|----------|----------|----------|-----------|-----------|-----------|
| Pt1  | 33.1(3)  | 28.2(3)  | 13.8(2)  | -5.62(16) | -4.49(15) | -7.84(17) |
| S2   | 33.1(13) | 33.2(14) | 20.9(12) | -6.6(10)  | -1.4(9)   | -8.7(10)  |
| N6   | 23(4)    | 40(5)    | 13(4)    | -7(3)     | -2(3)     | -12(3)    |
| N9   | 24(4)    | 40(5)    | 12(4)    | -8(4)     | -2(3)     | -6(4)     |
| C8   | 29(5)    | 31(5)    | 14(4)    | -1(4)     | -9(3)     | -5(4)     |
| C9   | 27(4)    | 25(5)    | 10(4)    | -8(3)     | 1(3)      | -2(3)     |
| C10  | 34(5)    | 27(5)    | 15(4)    | -5(4)     | -2(3)     | -7(4)     |
| C11  | 34(5)    | 27(5)    | 15(4)    | -9(4)     | -2(4)     | 1(4)      |
| C15  | 24(4)    | 31(5)    | 12(4)    | 4(4)      | -8(3)     | -4(4)     |
| C19  | 25(4)    | 31(5)    | 8(4)     | -8(4)     | 2(3)      | -4(4)     |
| C20  | 32(5)    | 46(6)    | 8(4)     | -8(4)     | -3(3)     | -11(4)    |
| C1   | 25(5)    | 40(6)    | 12(4)    | -3(4)     | -3(3)     | -2(4)     |
| C2   | 30(5)    | 35(5)    | 9(4)     | -2(4)     | 1(3)      | -7(4)     |
| C3   | 32(5)    | 43(6)    | 17(5)    | -2(4)     | -8(4)     | -13(4)    |
| C14  | 28(5)    | 26(5)    | 14(4)    | -10(4)    | -5(3)     | -4(4)     |
| C16  | 30(5)    | 46(6)    | 16(4)    | -2(4)     | -2(3)     | -21(4)    |
| O2   | 47(4)    | 37(4)    | 13(3)    | 1(3)      | -16(3)    | -4(3)     |
| O3   | 48(4)    | 30(4)    | 11(3)    | -7(3)     | -13(3)    | -3(3)     |
| O4   | 68(5)    | 37(5)    | 19(4)    | -5(4)     | -20(4)    | -4(3)     |
| O5   | 35(4)    | 32(4)    | 14(3)    | -1(3)     | -11(3)    | -5(3)     |
| O6   | 41(4)    | 47(5)    | 22(4)    | -7(3)     | -9(3)     | -22(3)    |
| O7   | 52(4)    | 40(5)    | 17(3)    | -9(3)     | -3(3)     | -14(3)    |
| C4   | 26(5)    | 42(6)    | 10(4)    | 0(4)      | -4(3)     | -6(4)     |
| C5   | 25(4)    | 25(5)    | 16(4)    | 3(3)      | -12(3)    | 0(4)      |
| C6   | 33(5)    | 32(5)    | 23(5)    | -4(4)     | -7(4)     | -15(4)    |
| C7   | 33(5)    | 35(6)    | 12(4)    | -5(4)     | -2(3)     | -13(4)    |
| C13  | 49(6)    | 58(8)    | 19(5)    | -21(6)    | -1(4)     | -25(5)    |
| C12  | 26(4)    | 28(5)    | 16(4)    | 0(4)      | -6(3)     | -8(4)     |
| C17  | 24(4)    | 33(5)    | 18(4)    | 1(4)      | -5(3)     | -12(4)    |
| C18  | 61(7)    | 38(7)    | 22(5)    | -12(5)    | -9(5)     | -10(5)    |
| C1a  | 56(7)    | 29(6)    | 25(5)    | -9(5)     | -11(5)    | -7(4)     |
| C1b  | 41(6)    | 44(7)    | 25(6)    | -7(5)     | -7(4)     | -10(5)    |
| C1c  | 31(5)    | 46(7)    | 26(5)    | -9(4)     | -7(4)     | -15(5)    |
| C1d  | 33(5)    | 34(6)    | 10(4)    | -7(4)     | -3(3)     | -10(4)    |
| C1e  | 38(6)    | 32(6)    | 52(8)    | 2(5)      | -11(5)    | -17(6)    |

Table 4 Bond Lengths for 10.

Atom Atom Length/ $\text{\AA}$  Atom Atom Length/ $\text{\AA}$

|     |     |           |     |     |           |
|-----|-----|-----------|-----|-----|-----------|
| Pt1 | S2  | 2.478(3)  | C19 | C2  | 1.398(13) |
| Pt1 | N6  | 2.145(9)  | C20 | C14 | 1.411(12) |
| Pt1 | N9  | 2.173(8)  | C1  | C2  | 1.389(15) |
| Pt1 | C13 | 2.063(10) | C2  | C5  | 1.504(12) |
| Pt1 | C1b | 2.037(13) | C3  | C4  | 1.391(15) |
| Pt1 | C1e | 2.069(12) | C3  | C12 | 1.394(12) |
| S2  | C12 | 1.766(10) | C14 | C16 | 1.389(14) |
| N6  | C15 | 1.371(11) | O2  | C5  | 1.207(11) |
| N6  | C16 | 1.343(13) | O3  | C18 | 1.427(13) |
| N9  | C9  | 1.319(13) | O5  | C5  | 1.341(12) |
| N9  | C11 | 1.341(13) | O5  | C1c | 1.443(10) |
| C8  | C15 | 1.366(14) | O6  | C6  | 1.224(11) |
| C8  | C20 | 1.409(13) | O7  | C6  | 1.346(13) |
| C9  | C15 | 1.495(12) | O7  | C1a | 1.433(13) |
| C9  | C19 | 1.395(12) | C4  | C7  | 1.416(14) |
| C10 | C20 | 1.494(15) | C6  | C7  | 1.490(14) |
| C10 | O3  | 1.333(11) | C7  | C17 | 1.389(12) |
| C10 | O4  | 1.205(12) | C12 | C1d | 1.417(14) |
| C11 | C1  | 1.385(13) | C17 | C1d | 1.385(13) |

Table 5 Bond Angles for 10.

| Atom | Atom | Atom | Angle/°  | Atom | Atom | Atom | Angle/°   |
|------|------|------|----------|------|------|------|-----------|
| N6   | Pt1  | S2   | 94.3(2)  | C9   | C15  | N6   | 114.3(8)  |
| N9   | Pt1  | S2   | 88.0(2)  | C9   | C15  | C8   | 123.4(8)  |
| N9   | Pt1  | N6   | 76.7(3)  | C2   | C19  | C9   | 117.8(9)  |
| C13  | Pt1  | S2   | 92.6(4)  | C10  | C20  | C8   | 123.3(8)  |
| C13  | Pt1  | N6   | 97.6(4)  | C14  | C20  | C8   | 117.4(10) |
| C13  | Pt1  | N9   | 174.2(4) | C14  | C20  | C10  | 119.3(9)  |
| C1b  | Pt1  | S2   | 86.4(4)  | C2   | C1   | C11  | 118.6(9)  |
| C1b  | Pt1  | N6   | 176.4(3) | C1   | C2   | C19  | 119.4(9)  |
| C1b  | Pt1  | N9   | 99.8(4)  | C5   | C2   | C19  | 121.5(9)  |
| C1b  | Pt1  | C13  | 85.9(5)  | C5   | C2   | C1   | 119.0(8)  |
| C1e  | Pt1  | S2   | 175.0(4) | C12  | C3   | C4   | 121.1(10) |
| C1e  | Pt1  | N6   | 89.9(4)  | C16  | C14  | C20  | 118.6(9)  |
| C1e  | Pt1  | N9   | 90.4(4)  | C14  | C16  | N6   | 123.6(8)  |
| C1e  | Pt1  | C13  | 89.5(5)  | C18  | O3   | C10  | 115.5(8)  |
| C1e  | Pt1  | C1b  | 89.2(5)  | C1c  | O5   | C5   | 114.6(7)  |
| C12  | S2   | Pt1  | 102.8(3) | C1a  | O7   | C6   | 115.4(7)  |
| C15  | N6   | Pt1  | 116.0(6) | C7   | C4   | C3   | 120.0(8)  |
| C16  | N6   | Pt1  | 126.2(6) | O2   | C5   | C2   | 124.2(9)  |
| C16  | N6   | C15  | 117.7(9) | O5   | C5   | C2   | 111.8(8)  |
| C9   | N9   | Pt1  | 115.1(7) | O5   | C5   | O2   | 123.9(9)  |



|     |     |     |          |     |     |     |           |
|-----|-----|-----|----------|-----|-----|-----|-----------|
| C11 | N9  | Pt1 | 124.5(7) | O7  | C6  | O6  | 122.7(10) |
| C11 | N9  | C9  | 120.3(8) | C7  | C6  | O6  | 125.1(10) |
| C20 | C8  | C15 | 120.5(8) | C7  | C6  | O7  | 112.3(8)  |
| C15 | C9  | N9  | 117.9(8) | C6  | C7  | C4  | 119.1(8)  |
| C19 | C9  | N9  | 122.2(9) | C17 | C7  | C4  | 119.0(9)  |
| C19 | C9  | C15 | 119.8(8) | C17 | C7  | C6  | 121.8(9)  |
| O3  | C10 | C20 | 112.1(8) | C3  | C12 | S2  | 121.6(8)  |
| O4  | C10 | C20 | 122.6(9) | C1d | C12 | S2  | 120.1(7)  |
| O4  | C10 | O3  | 125.3(9) | C1d | C12 | C3  | 118.3(9)  |
| C1  | C11 | N9  | 121.6(9) | C1d | C17 | C7  | 120.8(9)  |
| C8  | C15 | N6  | 122.2(8) | C17 | C1d | C12 | 120.7(9)  |

Table 6 Hydrogen Atom Coordinates ( $\text{\AA}\times 10^4$ ) and Isotropic Displacement Parameters ( $\text{\AA}^2\times 10^3$ ) for 10.

| Atom | x          | y         | z        | U(eq) |
|------|------------|-----------|----------|-------|
| H18a | 140(120)   | -2790(20) | 8520(20) | 58(4) |
| H18b | 1610(40)   | -3042(10) | 9280(60) | 58(4) |
| H18c | -490(80)   | -2735(17) | 9620(40) | 58(4) |
| H1aa | 6820(50)   | -3310(20) | 7850(60) | 54(4) |
| H1ab | 5470(120)  | -3374(16) | 8862(8)  | 54(4) |
| H1ac | 4650(80)   | -3047(9)  | 7830(60) | 54(4) |
| H1d  | 7364(13)   | 1414(8)   | 8121(7)  | 29(2) |
| H17  | 7122(12)   | -356(8)   | 8270(7)  | 29(2) |
| H4   | 5327(13)   | 562(9)    | 5520(7)  | 32(2) |
| H3   | 5572(13)   | 2339(9)   | 5372(7)  | 35(3) |
| H1   | 1363(13)   | 4291(9)   | 4028(7)  | 32(3) |
| H19  | 621(12)    | 1373(8)   | 6137(7)  | 26(2) |
| H16  | 3665(13)   | 1869(9)   | 9539(7)  | 34(3) |
| H8   | 1059(13)   | 379(8)    | 7582(7)  | 29(2) |
| H14  | 3027(12)   | 79(8)     | 10204(7) | 27(2) |
| H1ca | -240(50)   | 1150(60)  | 3220(20) | 49(3) |
| H1cb | -1270(100) | 264(15)   | 4140(30) | 49(3) |
| H1cc | -2280(50)  | 1400(50)  | 3710(50) | 49(3) |
| H1ea | 800(30)    | 4330(70)  | 8770(30) | 59(4) |
| H1eb | 380(60)    | 4990(30)  | 7670(40) | 59(4) |
| H1ec | -120(30)   | 3780(40)  | 8140(60) | 59(4) |
| H13a | 4680(120)  | 4791(13)  | 8550(30) | 57(4) |
| H13b | 3660(60)   | 3780(70)  | 9312(15) | 57(4) |
| H13c | 5690(60)   | 3650(60)  | 8760(50) | 57(4) |
| H1ba | 3100(80)   | 5851(11)  | 7100(40) | 55(4) |
| H1bb | 5190(30)   | 5531(17)  | 6750(50) | 55(4) |
| H1bc | 3630(110)  | 5601(19)  | 6070(20) | 55(4) |

## Experimental

Single crystals of  $C_{25}H_{27}N_2O_6PtS$  [10] were grown from toluene. A suitable crystal was selected and mounted on a diffractometer. The crystal was kept at 100 K during data collection. Using Olex2 [1], the structure was solved with the olex2.solve [2] structure solution program using Charge Flipping and refined with the olex2.refine [3] refinement package using Gauss-Newton minimisation.

1. Dolomanov, O.V., Bourhis, L.J., Gildea, R.J., Howard, J.A.K. & Puschmann, H. (2009), *J. Appl. Cryst.* 42, 339-341.
2. Bourhis, L.J., Dolomanov, O.V., Gildea, R.J., Howard, J.A.K., Puschmann, H. (2013). in preparation.
3. Bourhis, L.J., Dolomanov, O.V., Gildea, R.J., Howard, J.A.K., Puschmann, H. (2013). in preparation.

## Crystal structure determination of [10]

**Crystal Data** for  $C_{25}H_{27}N_2O_6PtS$  ( $M = 678.65$  g/mol): triclinic, space group P-1 (no. 2),  $a = 7.2201(5)$  Å,  $b = 13.2276(9)$  Å,  $c = 14.0336(10)$  Å,  $\alpha = 70.675(5)^\circ$ ,  $\beta = 80.551(6)^\circ$ ,  $\gamma = 84.130(6)^\circ$ ,  $V = 1245.94(16)$  Å<sup>3</sup>,  $Z = 2$ ,  $T = 100$  K,  $\mu(\text{Mo K}\alpha) = 5.756$  mm<sup>-1</sup>,  $D_{\text{calc}} = 1.8088$  g/cm<sup>3</sup>, 21239 reflections measured ( $5.18^\circ \leq 2\theta \leq 55.02^\circ$ ), 5677 unique ( $R_{\text{int}} = 0.2641$ ,  $R_{\text{sigma}} = 0.1575$ ) which were used in all calculations. The final  $R_1$  was 0.0804 ( $I > 2u(I)$ ) and  $wR_2$  was 0.2041 (all data). This was a challenging sample to handle with crystal disintegrating on handling, and redissolving if allowed to warm reflected in the large  $R_{\text{int}}$ .

## Refinement model description

Number of restraints - 0, number of constraints - 42.

## Details:

1. Fixed Uiso  
At 1.2 times of:  
All C(H) groups  
At 1.5 times of:  
All C(H,H,H) groups
- 2.a Aromatic/amide H refined with riding coordinates:  
C1d(H1d), C17(H17), C4(H4), C3(H3), C1(H1), C19(H19), C16(H16),  
C8(H8),  
C14(H14)
- 2.b Idealised Me refined as rotating group:  
C18(H18a,H18b,H18c), C1a(H1aa,H1ab,H1ac), C1c(H1ca,H1cb,H1cc),  
C1e(H1ea,H1eb,  
H1ec), C13(H13a,H13b,H13c), C1b(H1ba,H1bb,H1bc)

### S3. Flow cytometry

HeLa human cervical carcinoma cells were grown in DMEM (Lonza) supplemented with 10% fetal calf serum (Labtech) and 100 U/ml penicillin and 100  $\mu\text{g/ml}$  streptomycin (Lonza) at 37°C in a humidified incubator with 5% carbon dioxide. The cells were trypsinised according to standard procedures and re-suspended in ice-cold PBS at a concentration of  $1 \times 10^6$  cells/ml. **9** dissolved to 20 mg/ml in DMSO was added to obtain the indicated final concentrations. The cells were then incubated on ice at 0-4°C for 10 minutes before analysis using a BD FACSCanto II flow cytometer.

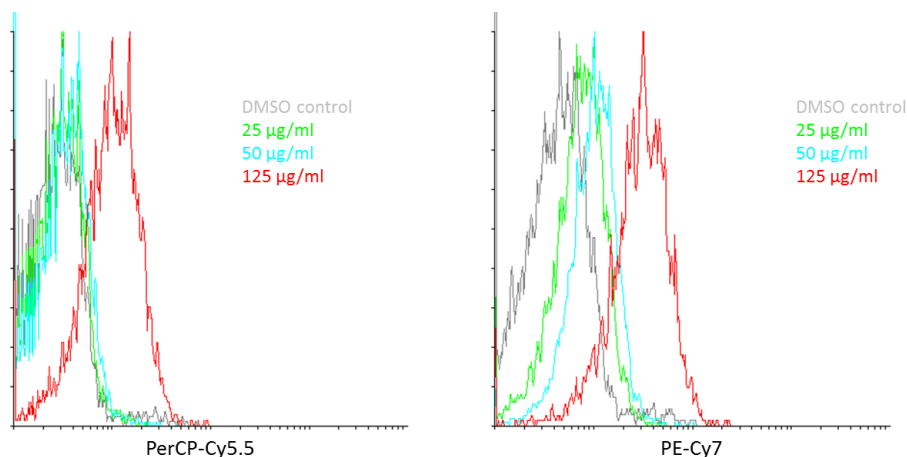

Figure S1. Flow cytometric analysis of **9** uptake by HeLa cells. Flow cytometry histograms of gated cells treated with the indicated concentrations of MC51 for 10 minutes. The PerCP-Cy5.5 channel detects fluorescence between 655 and 735 nm and the PE-Cy7 channel detects fluorescence between 750 and 810 nm

### Back and Side Scatter Profiles

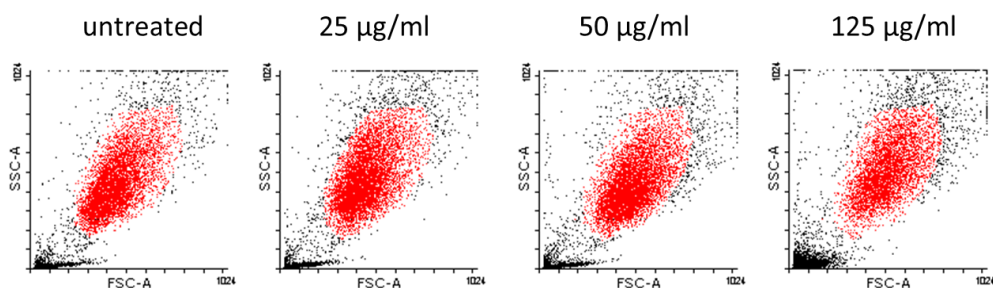

Figure S2. Dot plots of forward scatter (FSC) versus side scatter (SSC) for HeLa cells treated with **9**. Populations of cells selected for fluorescence histogram analysis are shown in red.

### S4. Confocal microscopy

HeLa S3 cells were grown on glass coverslips under the same conditions as in **S3**. The coverslips were washed briefly in PBS and then incubated in PBS containing **9** at the indicated concentrations for 10 minutes at 4°C. The coverslips were then washed in PBS and mounted by inversion on a glass slide. Images were captured on a Zeiss LSM 510 Meta laser scanning confocal microscope.

### S5. DFT calculations

DFT geometry optimisation and orbital calculations were performed in Gaussian09<sup>i</sup> using the B3LYP functional<sup>ii</sup> with Stuttgart-Dresden basis set and effective core potential for Pt,<sup>iii</sup> along with 6-31+G(d,p) on all non-metal atoms,<sup>iv</sup> and also included a simulated MeCN environment using the polarised continuum model (PCM) approach.<sup>v</sup>

**Table S1****Orbital make-up of selected absorptions****1**

Excited State 1: Singlet-A 3.0526 eV, 406.3 nm f=0.0003: Orbitals 67 -> 68  
Excited State 2: Singlet-A 3.0565 eV, 405.6 nm f=0.0007: Orbitals 66 -> 68  
Excited State 3: Singlet-A 3.4605 eV, 358.3 nm f=0.0276: Orbitals 65 -> 68  
Excited State 9: Singlet-A 4.2172 eV, 294.0 nm f=0.0835: Orbitals 64 -> 68

**4**

Excited State 1: Singlet-A 4.2176 eV, 294.0 nm f=0.1834: Orbitals 84 -> 85  
Excited State 4: Singlet-A 4.3720 eV, 283.6 nm f=0.1377: Orbitals 81 -> 85

**SH**

Excited State 1: Singlet-A 2.5430 eV, 487.6 nm f=0.0004: Orbitals 72 -> 73  
Excited State 2: Singlet-A 3.1548 eV, 393.0 nm f=0.0213: Orbitals 71 -> 73  
Excited State 7: Singlet-A 4.1161 eV, 301.2 nm f=0.0364: Orbitals 68 -> 73

**9**

Excited State 1: Singlet-A 2.4650 eV, 503.0 nm f=0.0017: Orbitals 107 -> 108  
Excited State 2: Singlet-A 2.8278 eV, 438.4 nm f=0.0599: Orbitals 106 -> 108  
Excited State 6: Singlet-A 3.6334 eV, 341.2 nm f=0.0974: Orbitals 106 -> 109  
Excited State 7: Singlet-A 3.8131 eV, 325.2 nm f=0.6042: Orbitals 106 -> 110

---

<sup>i</sup> Gaussian 09, Revision C.01, M. J. Frisch, G. W. Trucks, H. B. Schlegel, G. E. Scuseria, M. A. Robb, J. R. Cheeseman, G. Scalmani, V. Barone, B. Mennucci, G. A. Petersson, H. Nakatsuji, M. Caricato, X. Li, H. P. Hratchian, A. F. Izmaylov, J. Bloino, G. Zheng, J. L. Sonnenberg, M. Hada, M. Ehara, K. Toyota, R. Fukuda, J. Hasegawa, M. Ishida, T. Nakajima, Y. Honda, O. Kitao, H. Nakai, T. Vreven, J. A. Montgomery, Jr., J. E. Peralta, F. Ogliaro, M. Bearpark, J. J. Heyd, E. Brothers, K. N. Kudin, V. N. Staroverov, T. Keith, R. Kobayashi, J. Normand, K. Raghavachari, A. Rendell, J. C. Burant, S. S. Iyengar, J. Tomasi, M. Cossi, N. Rega, J. M. Millam, M. Klene, J. E. Knox, J. B. Cross, V. Bakken, C. Adamo, J. Jaramillo, R. Gomperts, R. E. Stratmann, O. Yazyev, A. J. Austin, R. Cammi, C. Pomelli, J. W. Ochterski, R. L. Martin, K. Morokuma, V. G. Zakrzewski, G. A. Voth, P. Salvador, J. J. Dannenberg, S. Dapprich, A. D. Daniels, O. Farkas, J. B. Foresman, J. V. Ortiz, J. Cioslowski, and D. J. Fox, Gaussian, Inc., Wallingford CT, 2010.

<sup>ii</sup> a) A. D. Becke, *J. Chem. Phys.*, 1993, **98**, 5648-52. b) C. Lee, W. Yang, R. G. Parr, *Phys. Rev. B*, 1988, **37**, 785-89.

<sup>iii</sup> D. Andrae, U. Haeussermann, M. Dolg, H. Stoll, and H. Preuss, *Theor. Chem. Acc.*, 1990, **77**, 123-41.

<sup>iv</sup> a) W. J. Hehre, R. Ditchfield and J. A. Pople, *J. Chem. Phys.*, 1972, **56**, 2257-2261. b) M. M. Francl, W. J. Pietro, W. J. Hehre, J. S. Binkley, M. S. Gordon, D. J. Defrees and J. A. Pople, *J. Chem. Phys.*, 1982, **77**, 3654-3665. c) T. Clark, J. Chandrasekhar, G. W. Spitznagel and P. V. Schleyer, *J. Comput. Chem.*, 1983, **4**, 294-301.

<sup>v</sup> J. Tomasi, B. Mennucci, and R. Cammi, *Chem. Rev.*, 2005, **105**, 2999-3093, and references cited therein.
